# Supplementary material for: MR Intensity Normalization Methods Impact Sequence Specific Radiomics Prognostic Model Performance in Primary and Recurrent High-Grade Glioma
Source: MDPI journal article supplement (doi:10.3390/cancers15030965), 2023-02-02
Supplement: s1 [file s1]

**Abbreviations**

- AIC: Akaike Information Criterion
- C-I: Concordance index
- CPH: Cox Proportional Hazard models
- CSF: cerebrospinal fluid
- CV: cross-validation
- DE: dependence entropy
- DICOM: Digital Imaging COmmunication in Medicine
- FLAIR: fluid attenuated inversion recovery
- GBM: glioblastoma
- GLCM: Gray Level Co-occurrence Matrix
- GLDM: Gray Level Dependence Matrix
- GLRLM: Gray Level Run Length Matrix
- GLSZM: Gray Level Size Zone Matrix
- GM: gray matter
- GMM: Gaussian mixture models
- GTV: Gross Tumor Volume
- HM: Nyul-Udupa histogram matching
- HR: Hazard ratio
- KDE: kernel density estimation
- LGLRE: Long Run Low Gray Level Emphasis
- LRHGLE: Long Run High Gray Level Emphasis
- LALGLE: Large Area Low Gray Level Emphasis
- LoG: Laplacian of Gaussian
- LoG3: Laplacian of Gaussian with sigma 3mm
- MD: mode
- MRI: magnetic resonance imaging
- MSE: mean squared error
- NN: no normalization
- OS: overall survival
- Or: original image
- POI: Poisson regression models
- RMS: Root Mean Squared

ROI: region of interest  
rs: Spearman correlation coefficient  
RSF: Random survival forest  
RT: radiotherapy  
SAE: Small Area Emphasis  
SALGLE: Small Area Low Gray Level Emphasis  
SE: sensitivity  
SP: specificity  
SRHGLE: Short Run High Gray Level Emphasis  
SRLGLE: Short Run Low Gray Level Emphasis  
SS: structure set  
T1w: T1-weighted  
T1wce: T1-weighted contrast-enhanced  
T2w: T2-weighted  
TI: Inversion time  
TE: Echo time  
TR: Repetition time  
WM: white matter  
WS: white stripe  
WV: wavelet filter transformation

Tables and figures

**Supplementary-Table S1.** Intensity normalization algorithms applied in MR-based radiomics and deep learning-based survival prediction studies in high-grade glioma patients.

| Method                  | Studies                              |
|-------------------------|--------------------------------------|
| Histogram matching      | [24, 25, 31]                         |
| z-score                 | [26, 32, 33, 35, 37, 40, 43, 46]     |
| White strip             | [30, 45, 47]                         |
| No method/not mentioned | [23, 27, 29, 34, 36, 38, 41, 42, 44] |

Supplementary-Table S2. MR scanner models found in the cohorts.

| Dataset | Manufacturer | Tesla | Model                                   |
|---------|--------------|-------|-----------------------------------------|
| C1      | Siemens      | 1     | Harmony                                 |
|         |              | 1.5   | Avanto, Aera, Espree, Sonata, Symphony  |
|         |              | 3     | Prisma fit, Skyra, TrioTim, Verio       |
|         | Philips      | 1.5   | Achieva, Ingenia, Intera                |
| C2      | GE           | 1.5   | Optima MR450w, Signa HDxt               |
|         | Siemens      | 1     | Allegra, Harmony                        |
|         |              | 1.5   | Aera, Amira, Avanto, Espree, Vision     |
|         |              | 3     | Prisma fit, Skyra, Trio, TrioTim, Verio |
|         | Philips      | 1     | Panorama                                |
|         | GE           | 1.5   | Achieva, Ingenia, Intera                |
|         |              | 1.5   | Signa                                   |

Supplementary-Table S3. MR image protocols found in the cohorts. TI: Inversion time, TE: Echo time, TR: Repetition time, FA: Flip angle.

|     | Protocol                                              | %  |                                                                            |
|-----|-------------------------------------------------------|----|----------------------------------------------------------------------------|
| T1w | Magnetization Prepared - Rapid Gradient Echo (MPRAGE) | 73 | TI: 800-1100 ms, TE: 2.27-4 ms, TR: 1680-2200 ms, and FA: 7-15°            |
|     |                                                       |    | In-plane resolution: 0.42 x 0.42 – 1 x 1 mm, Slice thickness: 0.9-1.3 mm   |
|     | Spin Echo                                             | 12 | TE: 8-17 ms, TR: 350-744 ms, and FA: 70-90°                                |
|     |                                                       |    | In-plane resolution: 0.45 x 0.45 – 1.05 x 1.05 mm, Slice thickness: 3-6 mm |
|     | Turbo Field Echo                                      | 4  | TE: 3.17-4.7 ms, TR: 6.5-8.2 ms, and FA: 8°                                |
|     |                                                       |    | In-plane resolution: 0.5 x 0.5 – 0.93 x 0.93 mm, Slice thickness: 0.9-2 mm |
|     | 3D FLASH                                              | 4  | TE: 3.56-.9 ms, TR: 7.3-15 ms, and FA: 10-30°                              |
|     |                                                       |    | In-plane resolution: 0.93x 0.93 mm, Slice thickness: 1.2 mm                |
|     | Turbo Spin Echo                                       | 2  | TE: 11 ms, TR: 400-439 ms, and FA: 150°                                    |
|     |                                                       |    | In-plane resolution: 0.45 x 0.45 – 0.75 x .78 mm, Slice thickness: 3-6 mm  |
|     | FLASH                                                 | 2  | TE: 2.48-4 ms, TR: 220-355 ms, and FA: 70-90°                              |
|     |                                                       |    | In-plane resolution: 0.4 x 0.4 – 0.6 x 0.6 mm, Slice thickness: 4-5 mm     |

|           |                                |    |                                                                                                                    |
|-----------|--------------------------------|----|--------------------------------------------------------------------------------------------------------------------|
|           |                                |    | TE: 1.69-2.41 ms, TR: 143-187 ms, and FA: 80°                                                                      |
|           | Fast Field Echo                | 1  | In-plane resolution: 0.36 x 0.36 – 0.9 x 0.9 mm, Slice thickness: 5-6 mm                                           |
|           | Spoiled gradient echo (SPGR)   | 1  | TE: 3.47 ms, TR: 8.8 ms, and FA: 12°<br>In-plane resolution: 0.47 x 0.47 mm, Slice thickness: 1.2 mm               |
|           | SPGR BRAVO                     | 1  | TI: 300 ms, TE: 5.2 ms, TR: 12.38 ms, and FA: 20°<br>In-plane resolution: 0.94 x 0.94 mm, Slice thickness: 1.2 mm  |
| T2w       | Turbo Spin Echo                | 86 | TE: 10 ms, TR: 3000 ms, and FA: 140°<br>In-plane resolution: 0.22 x 0.22 – 0.97 x 0.97 mm, Slice thickness: 3-6 mm |
|           | Multiple Spin Echo             | 7  | TE: 10 ms, TR: 3000 ms, and FA: 140°<br>In-plane resolution: 0.88 x 0.88 mm, Slice thickness: 5 mm                 |
|           | Fast Spin Echo                 | 3  | TE: 10 ms, TR: 3000 ms, and FA: 140°<br>In-plane resolution: 0.88 x 0.88 mm, Slice thickness: 5 mm                 |
|           | Turbo Spin Echo/Propeller      | 2  | TE: 100 ms, TR: 5150-6100 ms, and FA: 160°<br>In-plane resolution: 0.46 x 0.46 mm, Slice thickness: 5.mm           |
|           | Turbo Spin Echo/Blade          | 2  | TE: 100 ms, TR: 4000 ms, and FA: 150°<br>In-plane resolution: 0.71 x 0.71 mm, Slice thickness: 5.5 mm              |
|           |                                |    |                                                                                                                    |
| T2w-FLAIR | Fast FLAIR                     | 69 | TI: 1700 ms, TE: 95 ms, TR: 8000 ms, and FA: 90°<br>In-plane resolution: 0.35 x 0.35 mm, Slice thickness: 3 mm     |
|           | Turbo Dark Fluid               | 17 | TI: 1950 ms, TE: 110 ms, TR: 9000 ms, and FA: 1500°<br>In-plane resolution: 0.94 x 0.94 mm, Slice thickness: 5 mm  |
|           | FLAIR with Fat Saturation (FS) | 14 | TI: 2500 ms, TE: 135 ms, TR: 10000 ms, and FA: 1800°<br>In-plane resolution: 1.05 x 1.05 mm, Slice thickness: 6 mm |



**Supplementary-Table S4.** Model performance metrics for each MR sequence and normalization method for cohort C1 - AIC CPH: Akaike Information Criterion Cox Proportional Hazard models, AIC POI: AIC Poisson regression models, C-I: Concordance Index, mse: mean squared error, csf: cerebrospinal fluid, wm: white matter, gm: grey matter, md: mode, gmm: Gaussian mixture models, kde: kernel density estimation, hm: Nyúl/Udupa histogram matching, ws: white stripe, nn: no normalization.

| C1      | T1wce     |         |         |       |       | T1w       |         |         |       |       | T2w       |         |         |       |       | T2w-FL    |         |         |       |       |
|---------|-----------|---------|---------|-------|-------|-----------|---------|---------|-------|-------|-----------|---------|---------|-------|-------|-----------|---------|---------|-------|-------|
|         | No. feat. | AIC CPH | AIC POI | C-I   | mse   | No. feat. | AIC CPH | AIC POI | C-I   | mse   | No. feat. | AIC CPH | AIC POI | C-I   | mse   | No. feat. | AIC CPH | AIC POI | C-I   | mse   |
| combat  | 4.4       | 1075.92 | 424.71  | 0.68  | 0.214 | 4         | 963.81  | 387.77  | 0.676 | 0.219 | 1.6       | 661.34  | 291.7   | 0.625 | 0.225 | 6         | 910.03  | 368.51  | 0.674 | 0.213 |
| csf     | 6.6       | 1057.96 | 418.54  | 0.696 | 0.213 | 3.8       | 979.68  | 397.75  | 0.645 | 0.217 | 2.6       | 670.3   | 294.2   | 0.636 | 0.234 | 4.8       | 911.54  | 368.16  | 0.662 | 0.214 |
| csf-gm  | 7.4       | 1037.33 | 410.22  | 0.708 | 0.226 | 4.2       | 977.4   | 396.51  | 0.655 | 0.216 | 3         | 669.88  | 295.01  | 0.636 | 0.225 | 5         | 909.05  | 366.76  | 0.669 | 0.208 |
| csf-md  | 5.4       | 1063.44 | 421.71  | 0.682 | 0.213 | 3.6       | 970.08  | 391.51  | 0.662 | 0.219 | 2.4       | 671.05  | 295.44  | 0.641 | 0.235 | 5         | 909.6   | 366.94  | 0.665 | 0.208 |
| gm      | 6.6       | 1057.27 | 419.28  | 0.691 | 0.213 | 4         | 978.68  | 397.49  | 0.639 | 0.217 | 2.8       | 676.17  | 297.95  | 0.635 | 0.246 | 5.4       | 907.96  | 365.91  | 0.67  | 0.21  |
| gm-md   | 5.2       | 1063.3  | 421.46  | 0.68  | 0.213 | 4.2       | 977.74  | 397.17  | 0.647 | 0.218 | 2.2       | 672.36  | 295.78  | 0.632 | 0.235 | 5.4       | 908.43  | 366.3   | 0.669 | 0.208 |
| gmm     | 6.4       | 1058.22 | 419.21  | 0.694 | 0.213 | 3.8       | 980.06  | 398.36  | 0.648 | 0.22  | 2.4       | 671.96  | 291.7   | 0.635 | 0.214 | 5.4       | 911.49  | 368.84  | 0.671 | 0.211 |
| hm      | 6.6       | 1060.47 | 419.17  | 0.691 | 0.209 | 4.4       | 969.87  | 389.05  | 0.666 | 0.216 | 2         | 666.87  | 293.7   | 0.655 | 0.222 | 5.2       | 913.99  | 369.14  | 0.666 | 0.201 |
| kde     | 6.4       | 1043.62 | 413.4   | 0.707 | 0.216 | 4.2       | 977.98  | 397.6   | 0.651 | 0.216 | 3         | 672.18  | 294.37  | 0.636 | 0.22  | 5.4       | 910.16  | 366.24  | 0.668 | 0.203 |
| nn      | 4.4       | 1078.98 | 425.38  | 0.677 | 0.21  | 4.6       | 976.81  | 395.25  | 0.659 | 0.213 | 2.6       | 663.64  | 294.21  | 0.625 | 0.228 | 5.2       | 918.55  | 370.59  | 0.66  | 0.212 |
| wm      | 6         | 1060.63 | 419.24  | 0.687 | 0.211 | 4.4       | 977.34  | 396.98  | 0.649 | 0.217 | 2.4       | 672.91  | 295.94  | 0.638 | 0.234 | 5         | 908.82  | 366.33  | 0.666 | 0.207 |
| wm-csf  | 6         | 1064.88 | 423.03  | 0.675 | 0.217 | 4.4       | 975.62  | 394.81  | 0.651 | 0.218 | 3         | 675.76  | 298.16  | 0.625 | 0.224 | 4.6       | 909.64  | 364.39  | 0.663 | 0.213 |
| wm-gm   | 6.4       | 1055.89 | 417.18  | 0.69  | 0.21  | 3.6       | 981.46  | 400.79  | 0.65  | 0.217 | 2.8       | 670.43  | 294.45  | 0.634 | 0.423 | 5         | 908.71  | 366.22  | 0.672 | 0.208 |
| wm-md   | 5.4       | 1061.88 | 420.72  | 0.682 | 0.214 | 4.4       | 978.27  | 397.1   | 0.652 | 0.218 | 2.8       | 670.8   | 294.97  | 0.634 | 0.242 | 5.2       | 907.05  | 366.15  | 0.67  | 0.207 |
| ws      | 6.8       | 1033.41 | 409.77  | 0.711 | 0.209 | 4.2       | 979.04  | 398.12  | 0.65  | 0.218 | 3         | 675.5   | 295.8   | 0.638 | 0.219 | 4.6       | 912.75  | 368.97  | 0.664 | 0.207 |
| z-score | 5.8       | 1058.63 | 416.4   | 0.693 | 0.202 | 3         | 977.69  | 394.24  | 0.644 | 0.211 | 2.4       | 663.53  | 293.13  | 0.636 | 0.272 | 4         | 917.95  | 371.92  | 0.661 | 0.205 |

**Supplementary-Table S5.** Model performance metrics for each MR sequence and normalization method for cohort C2 - AIC CPH: Akaike Information Criterion Cox Proportional Hazard models, AIC POI: AIC Poisson regression models, C-I: Concordance Index, mse: mean squared error, csf: cerebrospinal fluid, wm: white matter, gm: grey matter, md: mode, gmm: Gaussian mixture models, kde: kernel density estimation, hm: Nyúl/Udupa histogram matching, ws: white stripe, nn: no normalization.

| C2     | T1wce     |         |         |       |       | T1w       |         |         |       |       | T2w       |         |         |       |       | T2w-FLAIR |         |         |       |       |
|--------|-----------|---------|---------|-------|-------|-----------|---------|---------|-------|-------|-----------|---------|---------|-------|-------|-----------|---------|---------|-------|-------|
|        | No. feat. | AIC CPH | AIC POI | C-I   | mse   | No. feat. | AIC CPH | AIC POI | C-I   | mse   | No. feat. | AIC CPH | AIC POI | C-I   | mse   | No. feat. | AIC CPH | AIC POI | C-I   | mse   |
| combat | 3.6       | 561.43  | 262.01  | 0.638 | 0.154 | 4.4       | 497.46  | 238.44  | 0.624 | 0.151 | 3.4       | 417.59  | 199.56  | 0.673 | 0.126 | 6         | 525.47  | 243.63  | 0.706 | 0.156 |
| csf    | 3.2       | 559.66  | 258.3   | 0.647 | 0.153 | 3.2       | 495.12  | 236.39  | 0.624 | 0.151 | 3.8       | 420.13  | 199.39  | 0.651 | 0.13  | 6.4       | 524.68  | 239.19  | 0.694 | 0.164 |

|         |     |        |        |       |       |     |        |        |       |       |     |        |        |       |       |     |        |        |       |       |
|---------|-----|--------|--------|-------|-------|-----|--------|--------|-------|-------|-----|--------|--------|-------|-------|-----|--------|--------|-------|-------|
| csf-gm  | 2.8 | 555.38 | 255.67 | 0.646 | 0.212 | 4.4 | 494.94 | 238.34 | 0.627 | 0.154 | 3.6 | 421    | 201.05 | 0.647 | 0.139 | 6.8 | 521.74 | 236.78 | 0.705 | 0.152 |
| csf-md  | 2.2 | 561.73 | 259.62 | 0.624 | 0.158 | 3.6 | 496.35 | 240.74 | 0.627 | 0.148 | 5   | 418.29 | 198.62 | 0.664 | 0.16  | 5.2 | 522.18 | 237.62 | 0.7   | 0.17  |
| gm      | 5   | 560.18 | 259.12 | 0.64  | 0.151 | 3.2 | 496.95 | 239.6  | 0.623 | 0.149 | 4.8 | 419.55 | 200.26 | 0.656 | 0.129 | 6.6 | 522.35 | 237.27 | 0.703 | 0.147 |
| gm-md   | 3.4 | 562.82 | 260.87 | 0.628 | 0.146 | 4   | 495.46 | 238.15 | 0.636 | 0.16  | 4.8 | 416.06 | 198.14 | 0.659 | 0.135 | 6.6 | 522.38 | 237.17 | 0.705 | 0.165 |
| gmm     | 4   | 561.83 | 260.84 | 0.635 | 0.149 | 3.2 | 495.34 | 237.76 | 0.626 | 0.148 | 3.8 | 418    | 198.07 | 0.669 | 0.132 | 6.4 | 523.14 | 237.25 | 0.703 | 0.124 |
| hm      | 2.6 | 559.87 | 258.8  | 0.639 | 0.149 | 2.8 | 494.03 | 237.45 | 0.636 | 0.154 | 3.4 | 415.39 | 200.42 | 0.67  | 0.132 | 5.8 | 518.98 | 237.71 | 0.703 | 0.166 |
| kde     | 3.4 | 561.07 | 259.57 | 0.635 | 0.15  | 4.6 | 494.56 | 239.62 | 0.64  | 0.16  | 4.6 | 419.49 | 199.16 | 0.644 | 0.14  | 5.6 | 520.99 | 237.08 | 0.709 | 0.154 |
| nn      | 3   | 558    | 264.03 | 0.608 | 0.153 | 3.2 | 497.46 | 238.44 | 0.623 | 0.153 | 3.8 | 420.37 | 199.49 | 0.648 | 0.133 | 8.4 | 518.5  | 236.25 | 0.674 | 0.163 |
| wm      | 2.8 | 560.5  | 259.71 | 0.64  | 0.153 | 3   | 498.27 | 242.12 | 0.623 | 0.152 | 3.6 | 419.91 | 198.23 | 0.648 | 0.136 | 7.6 | 521.05 | 236.72 | 0.708 | 0.164 |
| wm-csf  | 3.2 | 562.35 | 261.09 | 0.638 | 0.146 | 3.8 | 496.77 | 242.35 | 0.633 | 0.152 | 3.4 | 412.13 | 195.97 | 0.646 | 0.131 | 6   | 508.27 | 230.37 | 0.717 | 0.151 |
| wm-gm   | 2.4 | 560.87 | 259.73 | 0.639 | 0.15  | 2.8 | 498.54 | 242    | 0.62  | 0.149 | 4   | 419.99 | 200.47 | 0.645 | 0.139 | 6.4 | 526.95 | 239.97 | 0.687 | 0.156 |
| wm-md   | 2.8 | 561.8  | 260.5  | 0.634 | 0.151 | 3.8 | 496.87 | 240.59 | 0.637 | 0.16  | 4.6 | 417.86 | 198.19 | 0.658 | 0.15  | 5.4 | 517.53 | 234.81 | 0.72  | 0.179 |
| ws      | 2.4 | 546.89 | 252.45 | 0.652 | 0.145 | 4   | 496.28 | 239.31 | 0.629 | 0.153 | 3.6 | 414.37 | 198.81 | 0.639 | 0.132 | 5   | 518.51 | 237.6  | 0.696 | 0.223 |
| z-score | 3.6 | 559.05 | 256.55 | 0.628 | 0.151 | 4.4 | 493.72 | 238.37 | 0.646 | 0.148 | 5   | 419.98 | 203.52 | 0.665 | 0.142 | 5.8 | 529.17 | 241.86 | 0.67  | 0.148 |

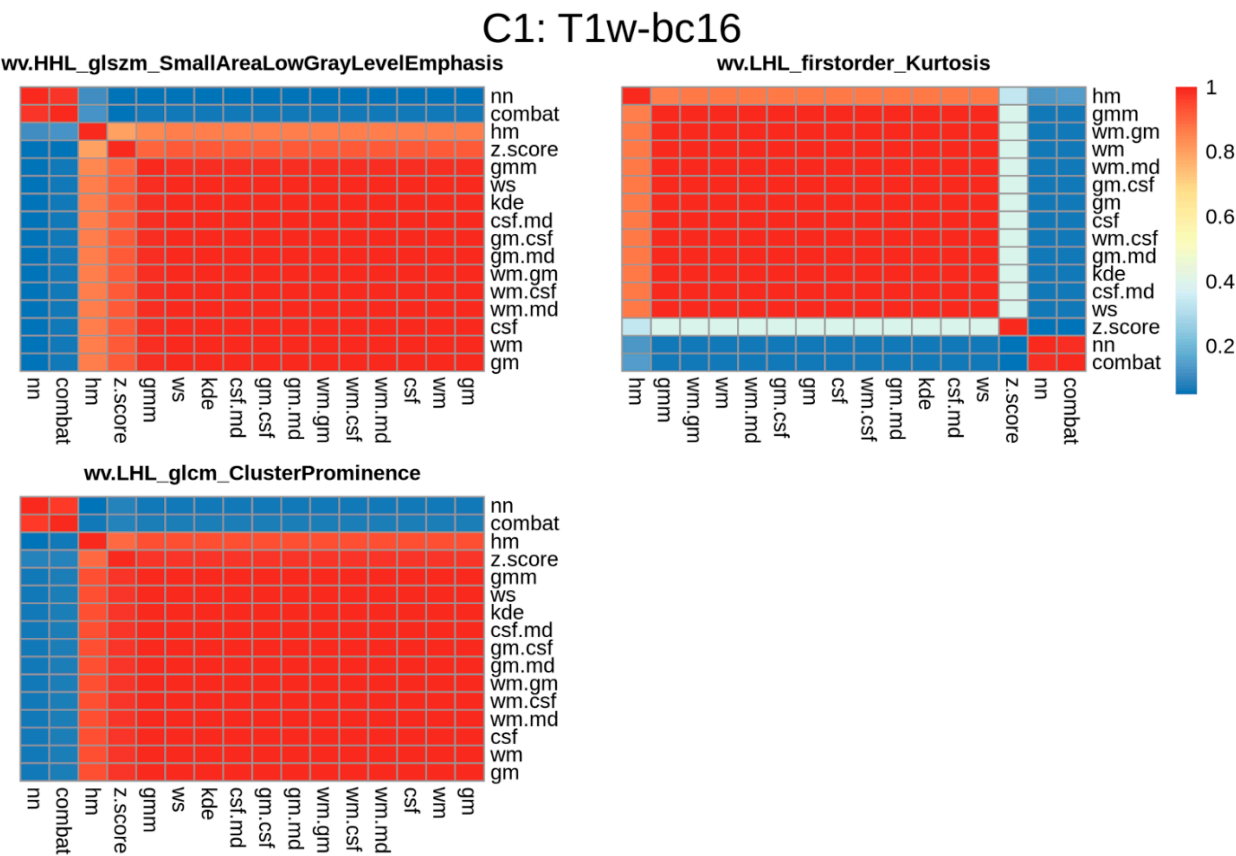

**Supplementary Figure S1-1.** Correlation heatmaps between the 15 different normalization methods considered and the reference non-normalized dataset for T1w significant features in cohort C1 discretized with bin counts of 16.

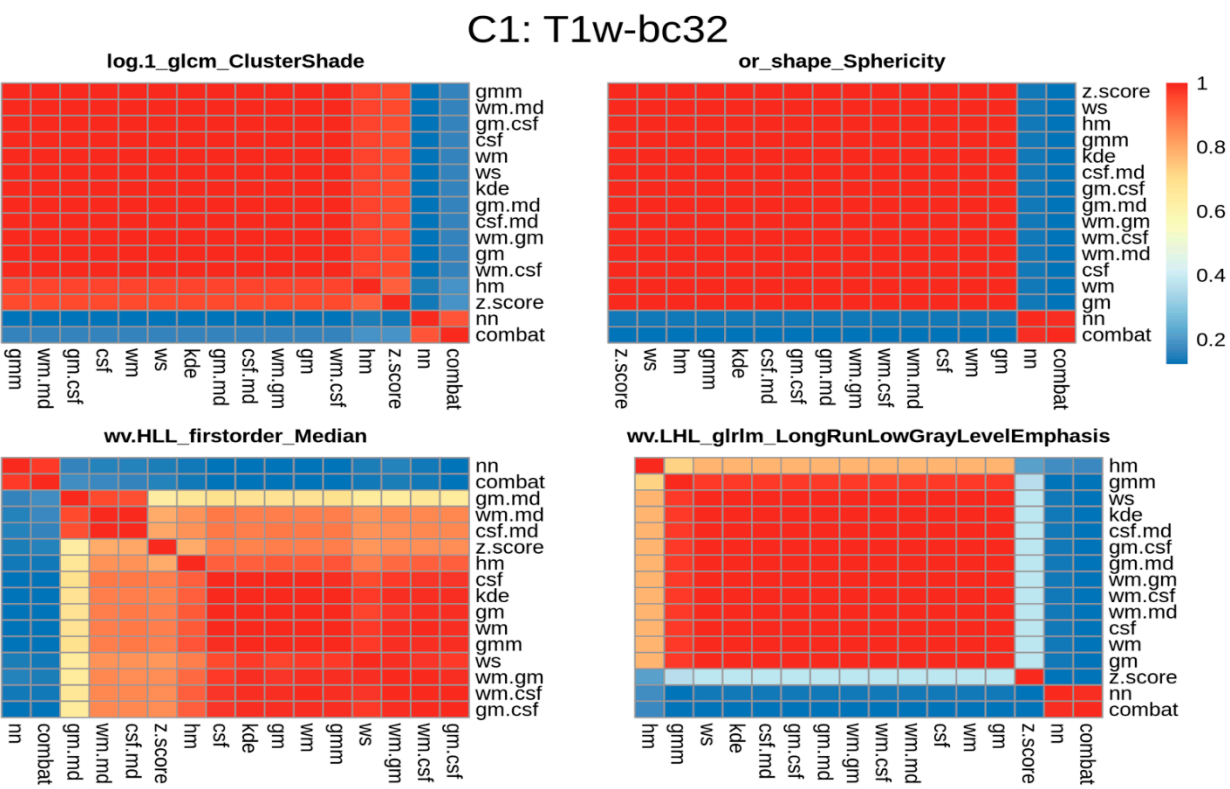

**Supplementary Figure S1-2.** Correlation heatmaps between the 15 different normalization methods considered and the reference non-normalized dataset for T1w significant features in cohort C1 discretized with bin counts of 32.

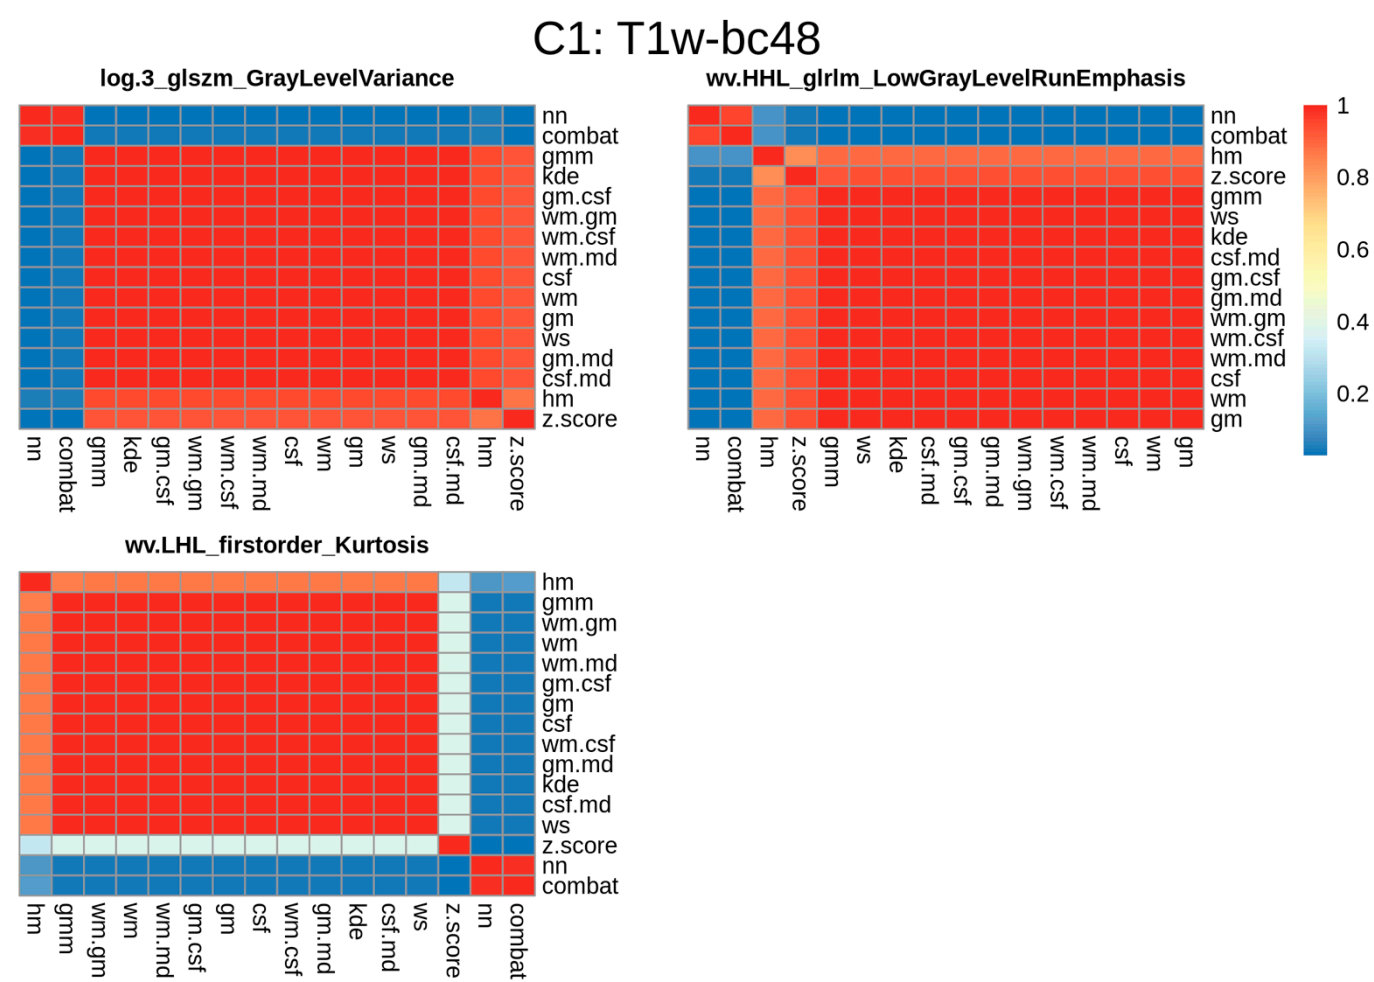

**Supplementary Figure S1-3.** Correlation heatmaps between the 15 different normalization methods considered and the reference non-normalized dataset for T1w significant features in cohort C1 discretized with bin counts of 48.

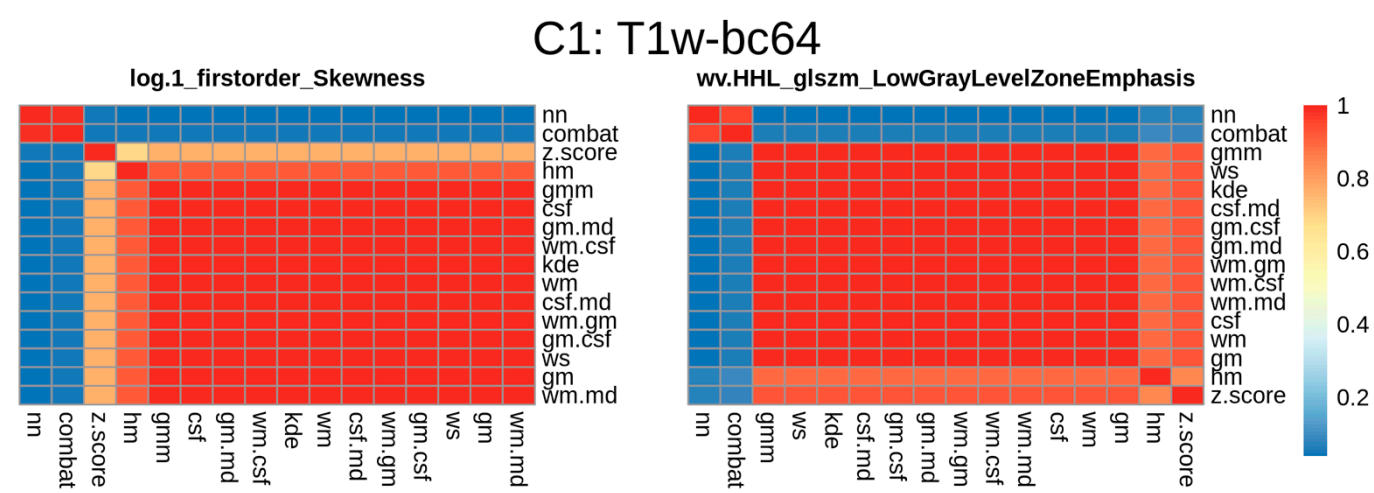

**Supplementary Figure S1-4.** Correlation heatmaps between the 15 different normalization methods considered and the reference non-normalized dataset for T1w significant features in cohort C1 discretized with bin counts of 64.

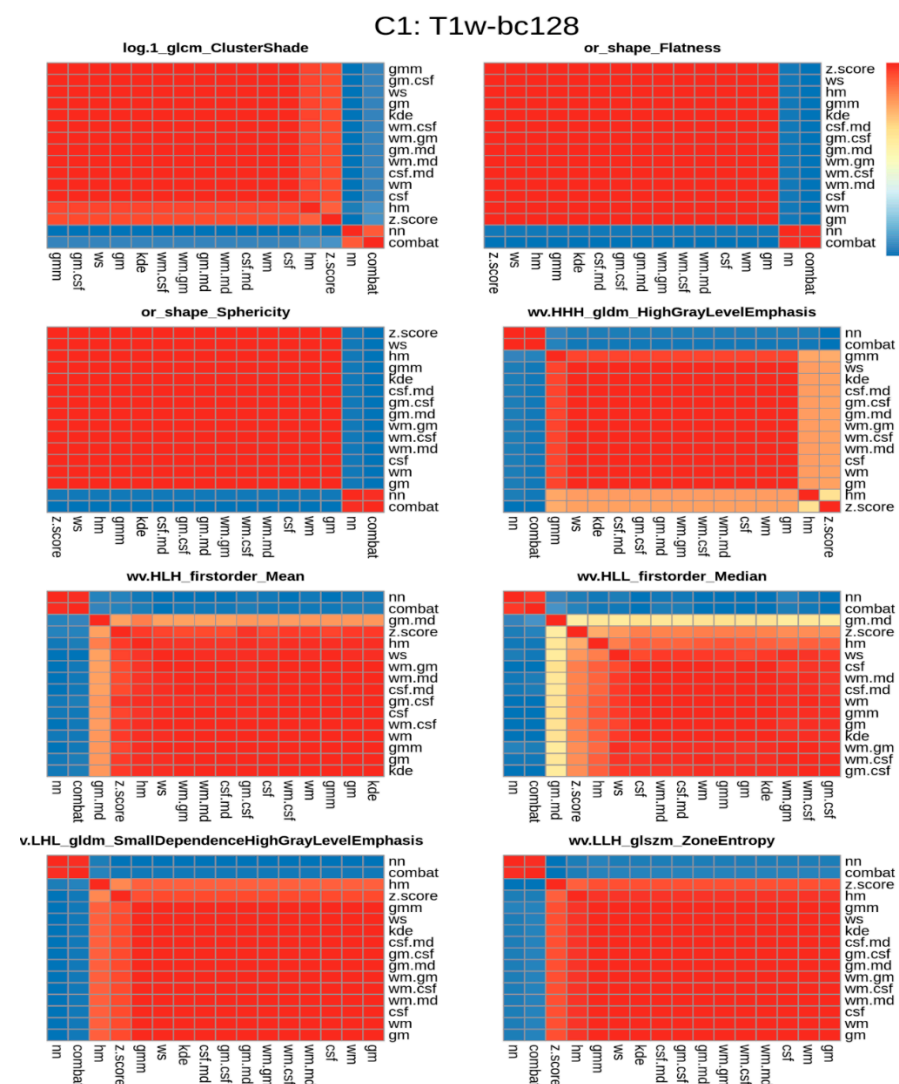

**Supplementary Figure S1-5.** Correlation heatmaps between the 15 different normalization methods considered and the reference non-normalized dataset for T1w significant features in cohort C1 discretized with bin counts of 128.

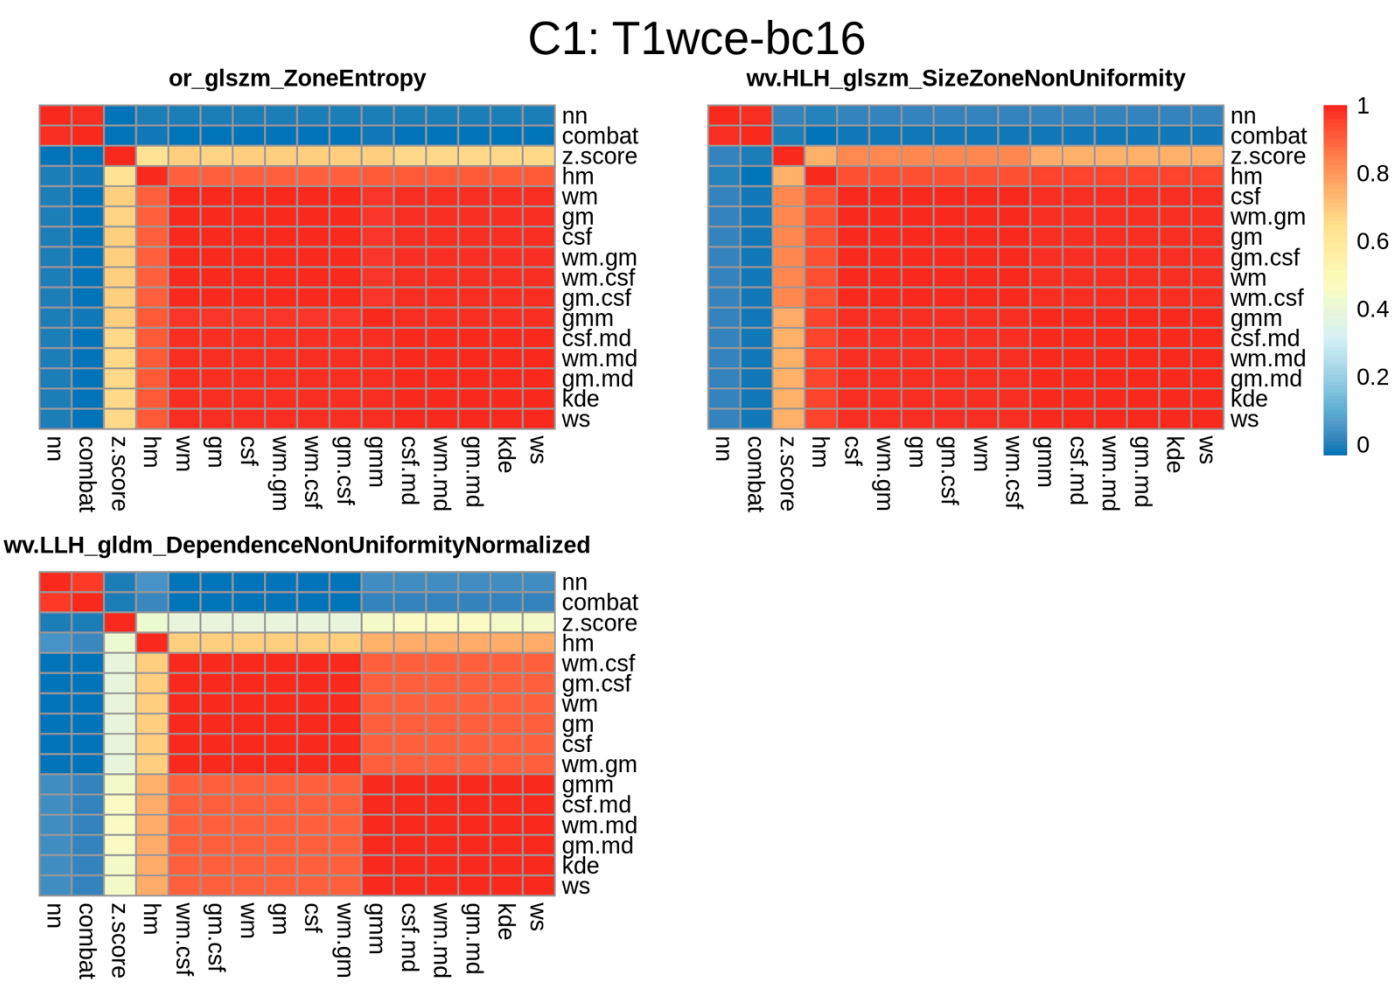

**Supplementary Figure S1-6.** Correlation heatmaps between the 15 different normalization methods considered and the reference non-normalized dataset for T1wce significant features in cohort C1 discretized with bin counts of 16.



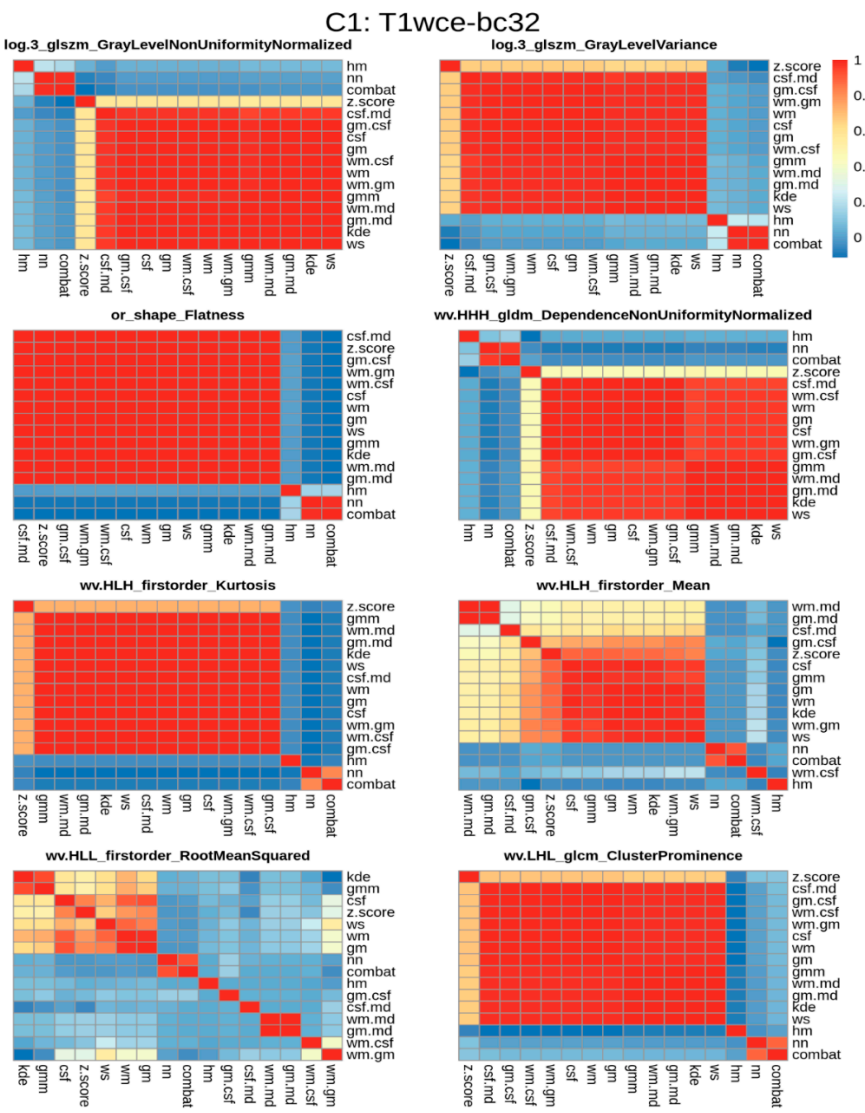

**Supplementary Figure S1-7.** Correlation heatmaps between the 15 different normalization methods considered and the reference non-normalized dataset for T1wce significant features in cohort C1 discretized with bin counts of 32.

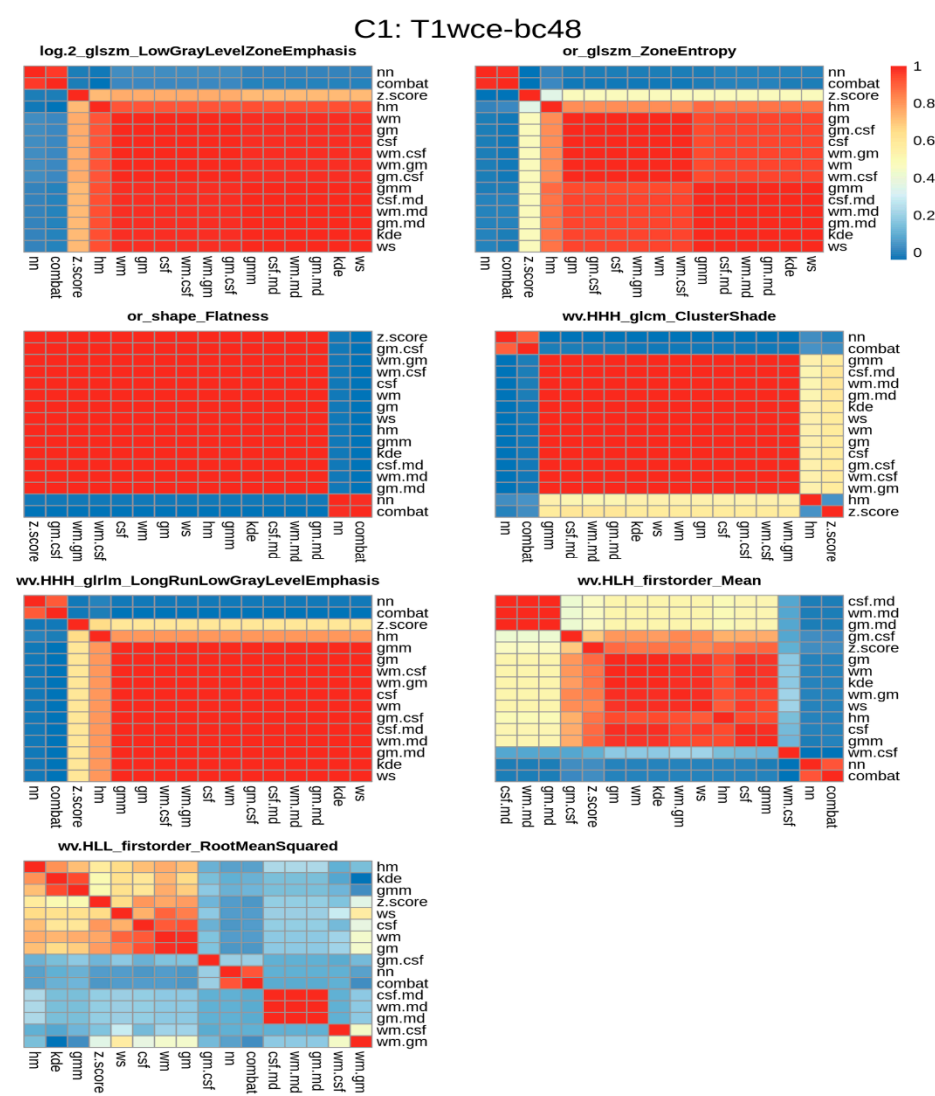

**Supplementary Figure S1-8.** Correlation heatmaps between the 15 different normalization methods considered and the reference non-normalized dataset for T1wce significant features in cohort C1 discretized with bin counts of 48.

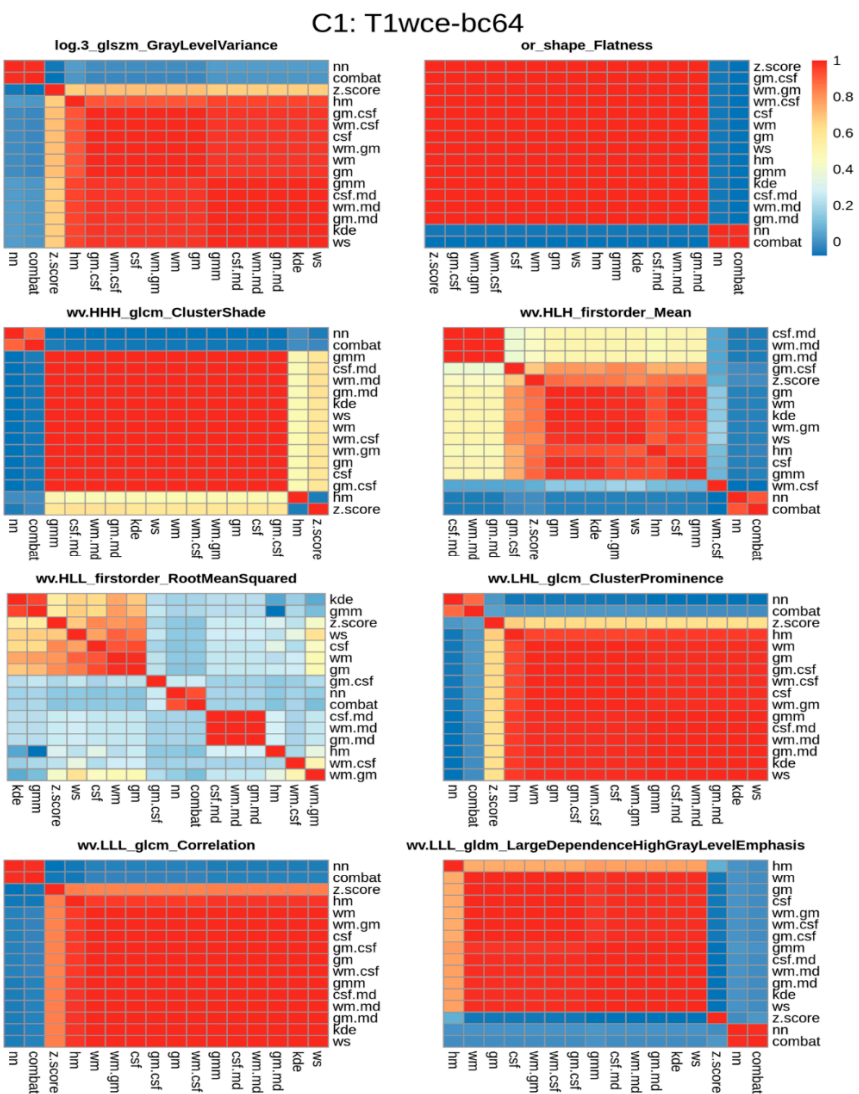

**Supplementary Figure S1-9.** Correlation heatmaps between the 15 different normalization methods considered and the reference non-normalized dataset for T1wce significant features in cohort C1 discretized with bin counts of 64.

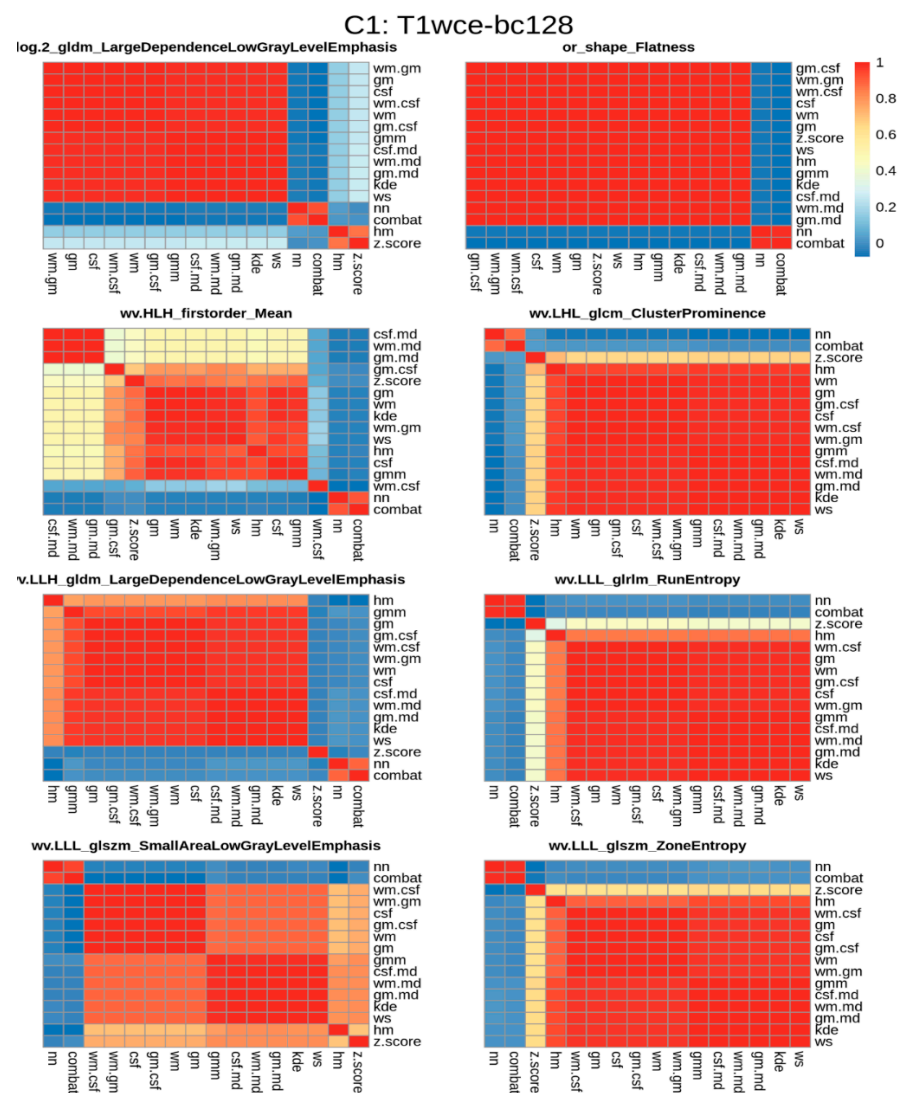

**Supplementary Figure S1-10.** Correlation heatmaps between the 15 different normalization methods considered and the reference non-normalized dataset for T1wce significant features in cohort C1 discretized with bin counts of 128.

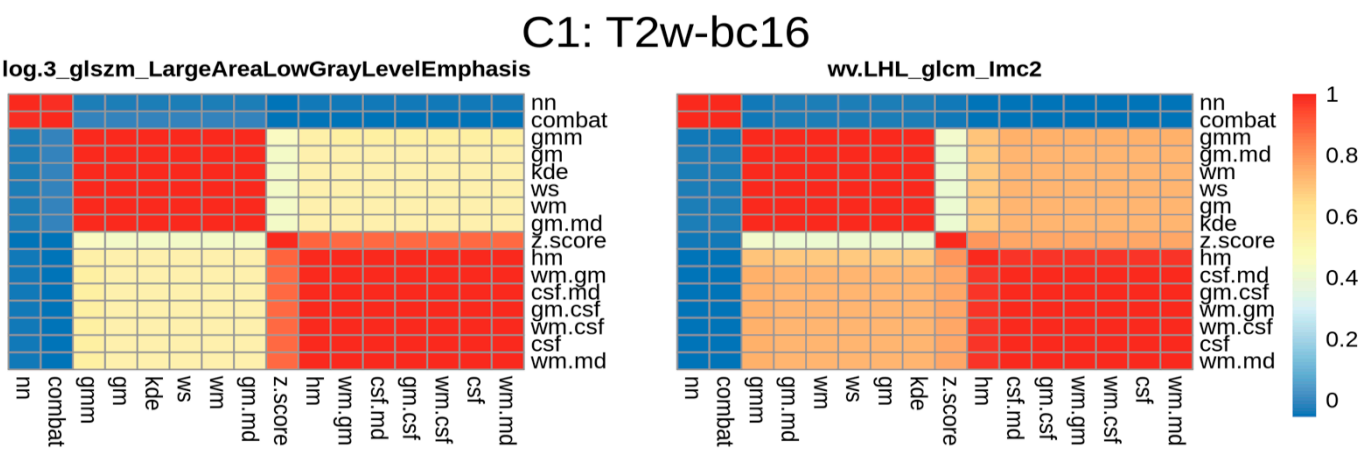

**Supplementary Figure S1-11.** Correlation heatmaps between the 15 different normalization methods considered and the reference non-normalized dataset for T2w significant features in cohort C1 discretized with bin counts of 16.

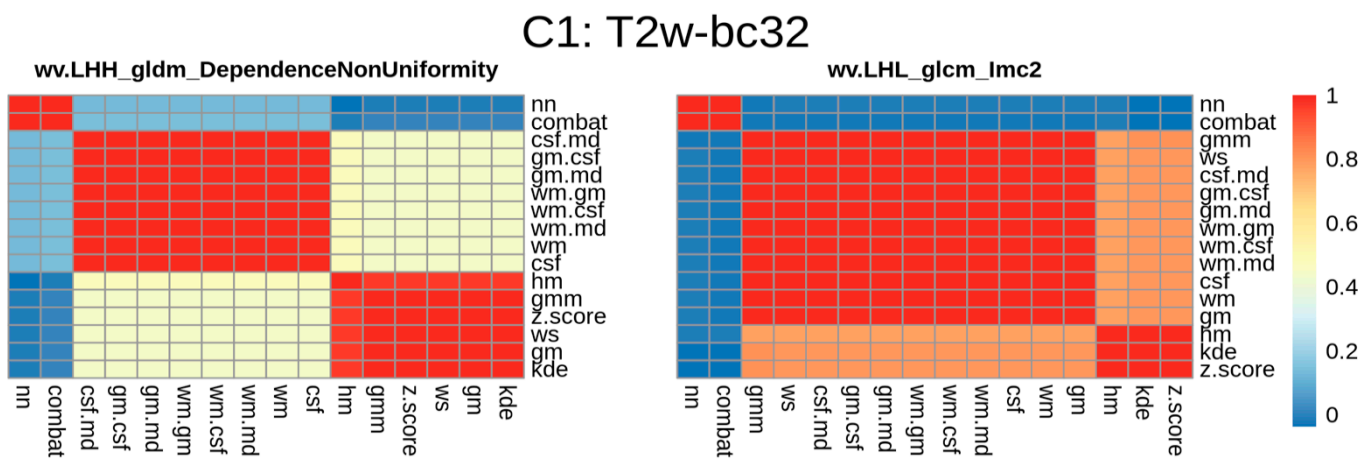

**Supplementary Figure S1-12.** Correlation heatmaps between the 15 different normalization methods considered and the reference non-normalized dataset for T2w significant features in cohort C1 discretized with bin counts of 32.

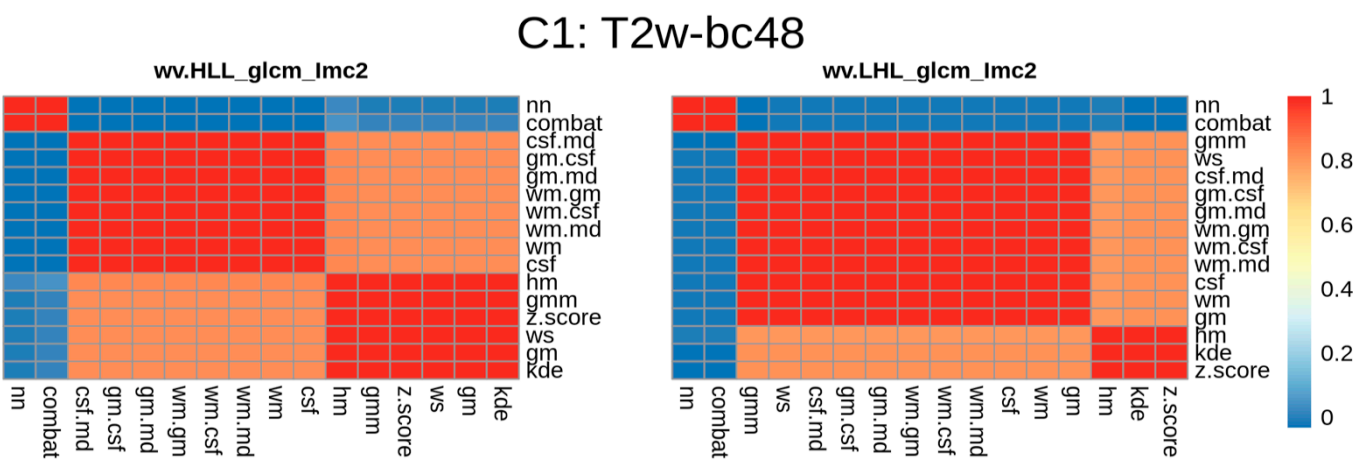

**Supplementary Figure S1-13.** Correlation heatmaps between the 15 different normalization methods considered and the reference non-normalized dataset for T2w significant features in cohort C1 discretized with bin counts of 48.

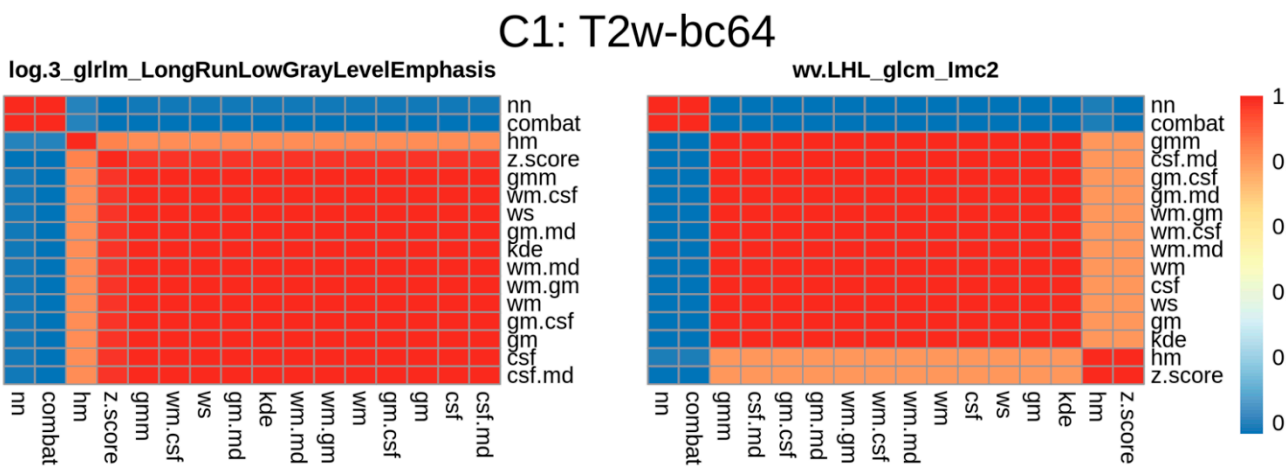

**Supplementary Figure S1-14.** Correlation heatmaps between the 15 different normalization methods considered and the reference non-normalized dataset for T2w significant features in cohort C1 discretized with bin counts of 64.

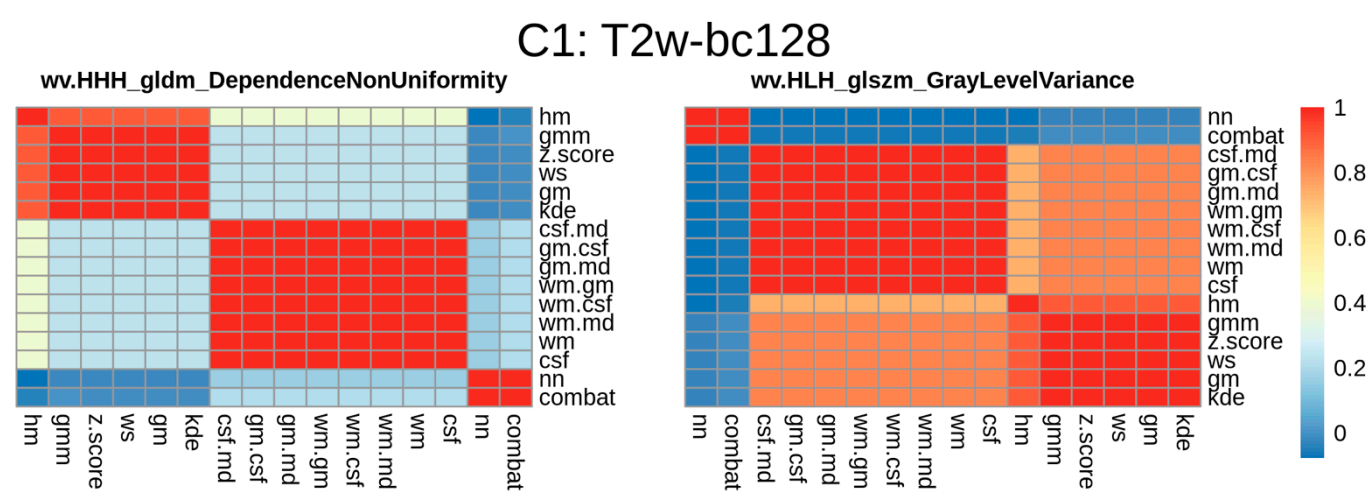

**Supplementary Figure S1-15.** Correlation heatmaps between the 15 different normalization methods considered and the reference non-normalized dataset for T2w significant features in cohort C1 discretized with bin counts of 128.

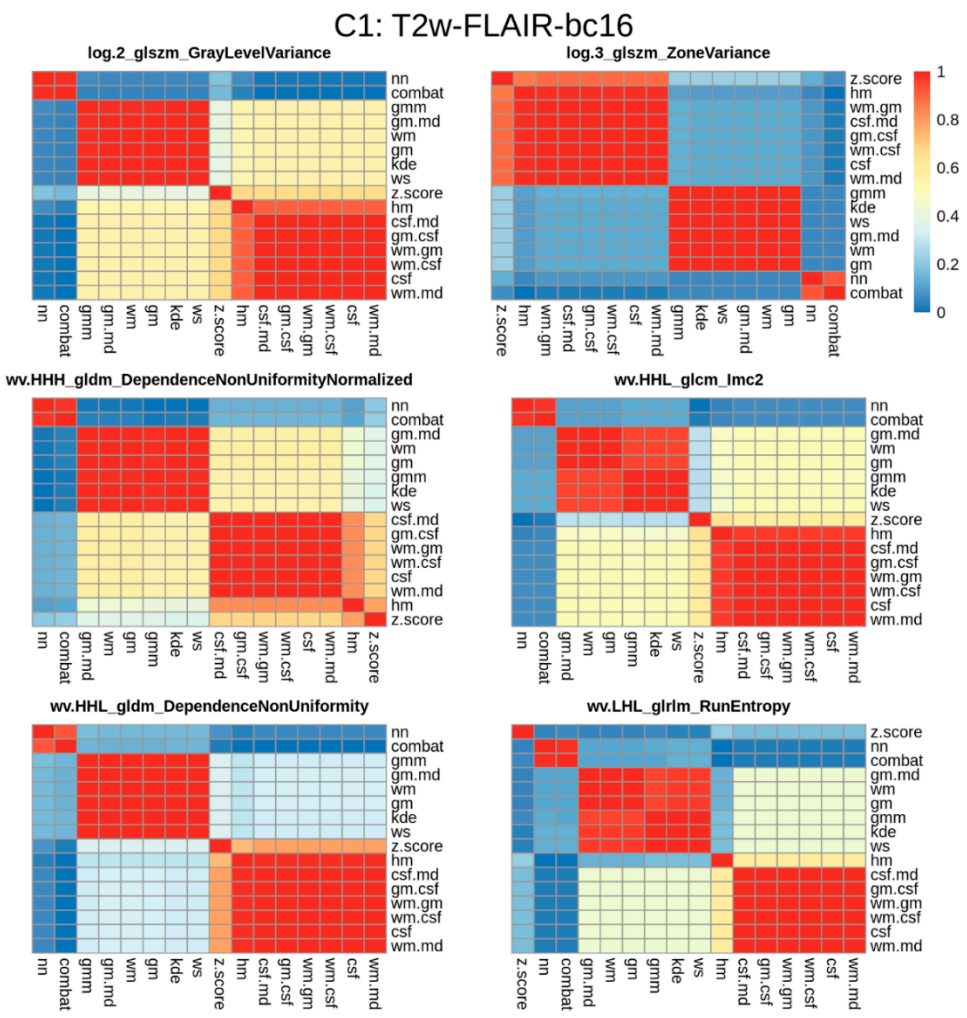

**Supplementary Figure S1-16.** Correlation heatmaps between the 15 different normalization methods considered and the reference non-normalized dataset for T2w-FLAIR significant features in cohort C1 discretized with bin counts of 16.



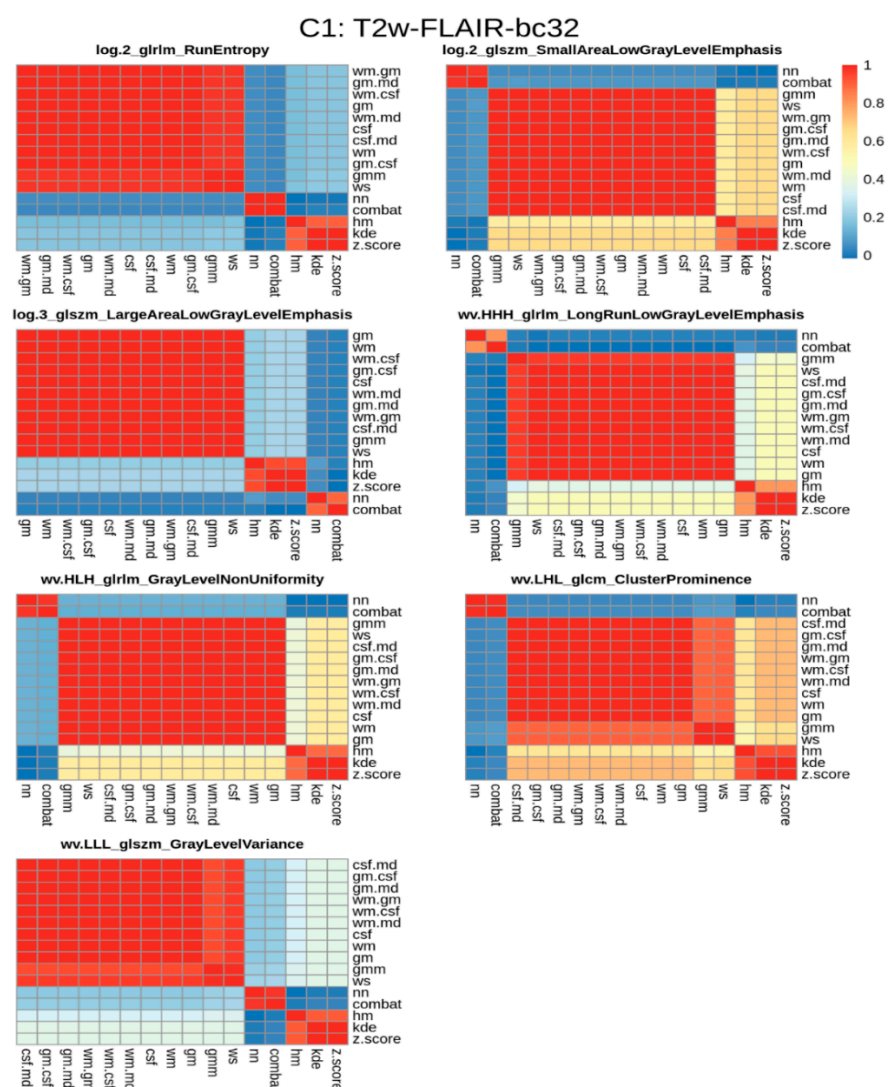

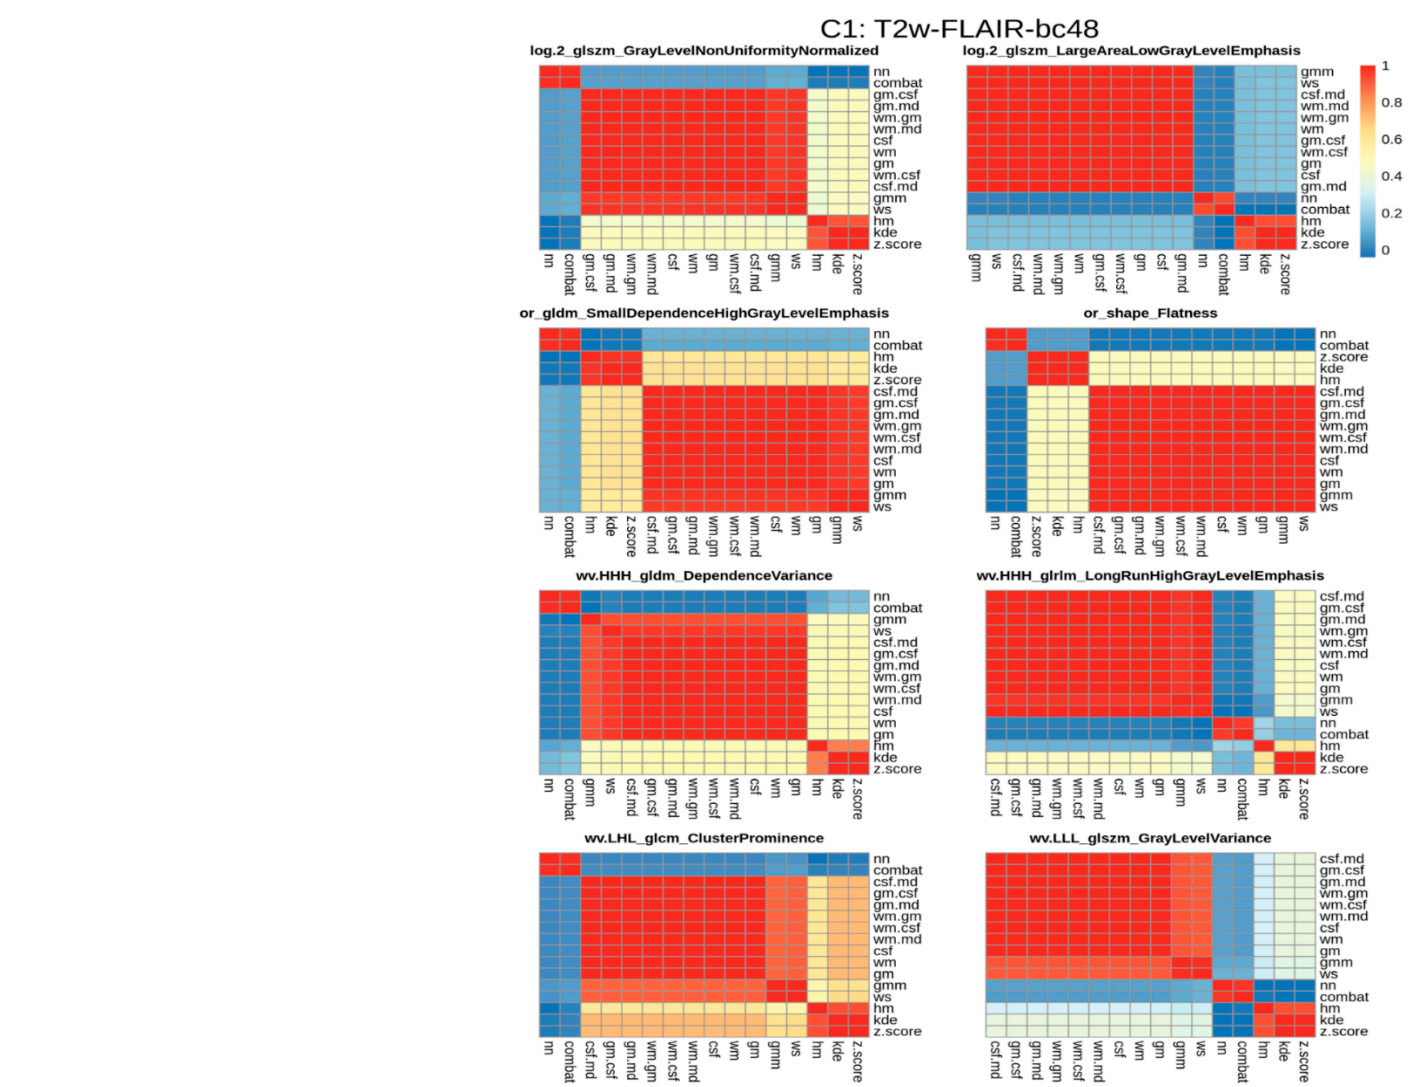

**Supplementary Figure S1-18.** Correlation heatmaps between the 15 different normalization methods considered and the reference non-normalized dataset for T2w-FLAIR significant features in cohort C1 discretized with bin counts of 48.

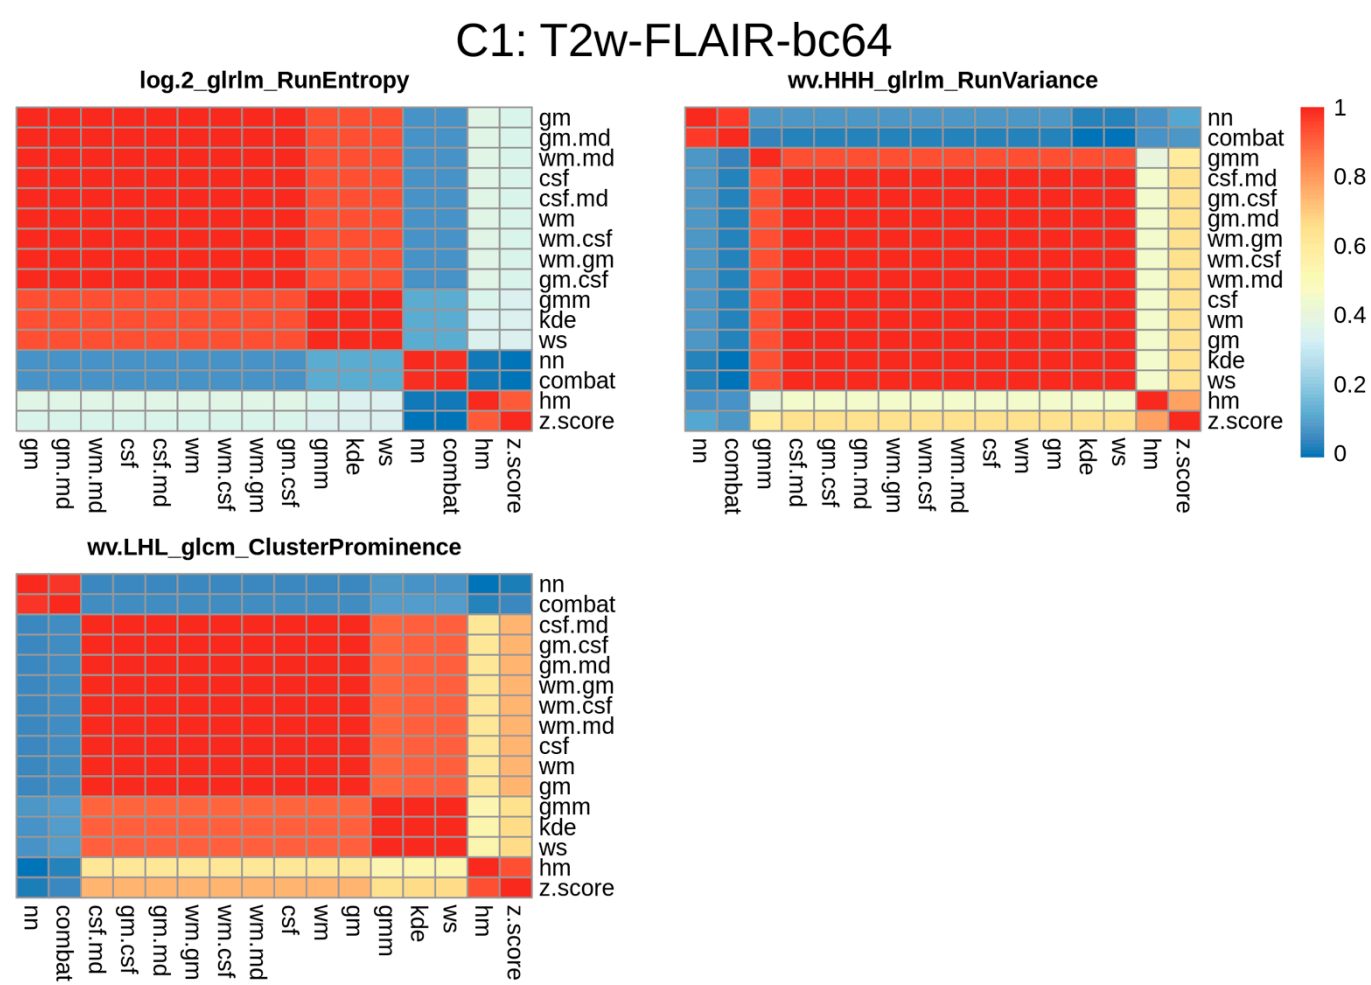

**Supplementary Figure S1-19.** Correlation heatmaps between the 15 different normalization methods considered and the reference non-normalized dataset for T2w-FLAIR significant features in cohort C1 discretized with bin counts of 64.

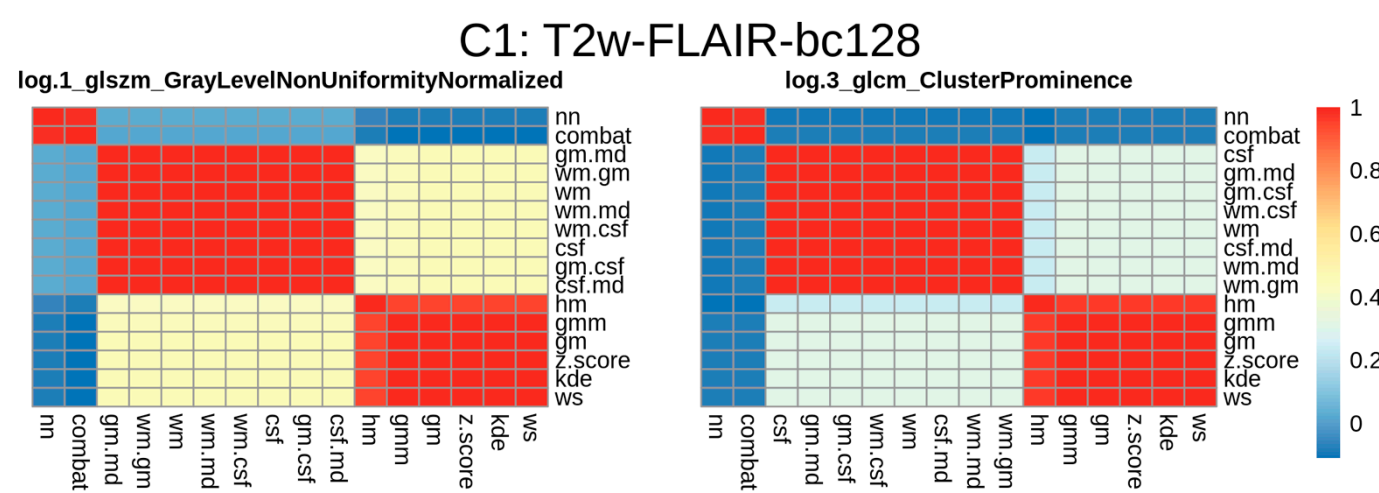

**Supplementary Figure S1-20.** Correlation heatmaps between the 15 different normalization methods considered and the reference non-normalized dataset for T2w-FLAIR significant features in cohort C1 discretized with bin counts of 128.

C2: T1w-bc16

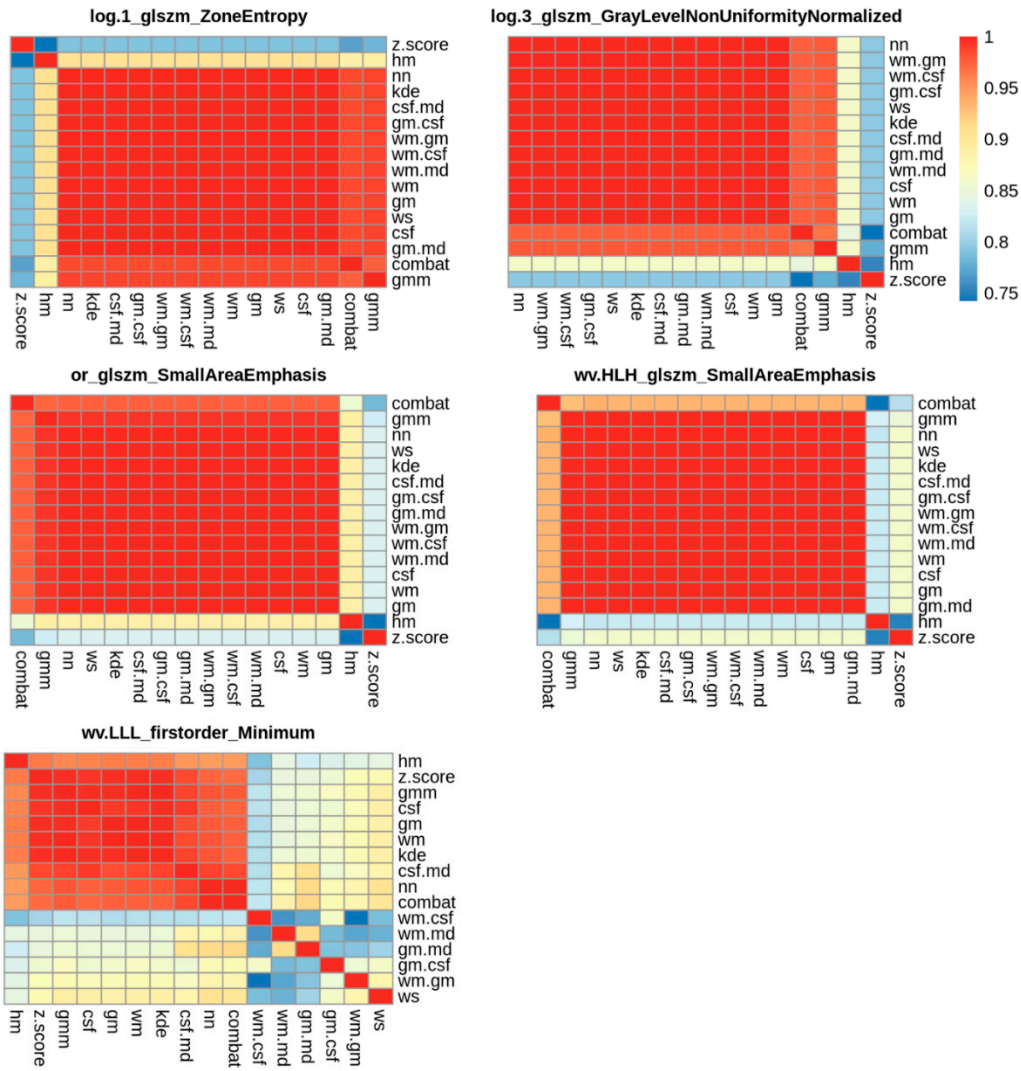

**Supplementary Figure S1-21.** Correlation heatmaps between the 15 different normalization methods considered and the reference non-normalized dataset for T1w significant features in cohort C2 discretized with bin counts of 16.

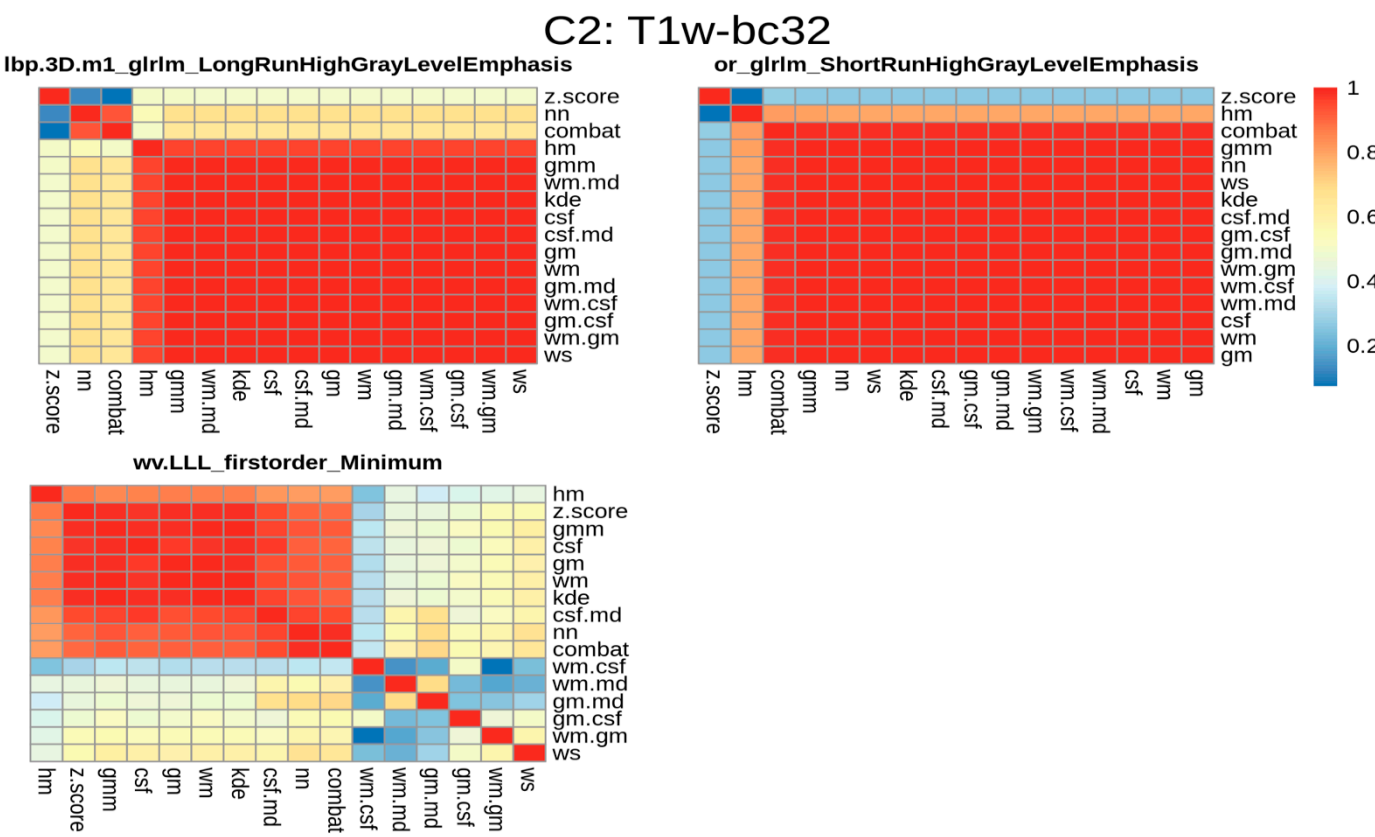

**Supplementary Figure S1-22.** Correlation heatmaps between the 15 different normalization methods considered and the reference non-normalized dataset for T1w significant features in cohort C2 discretized with bin counts of 32.

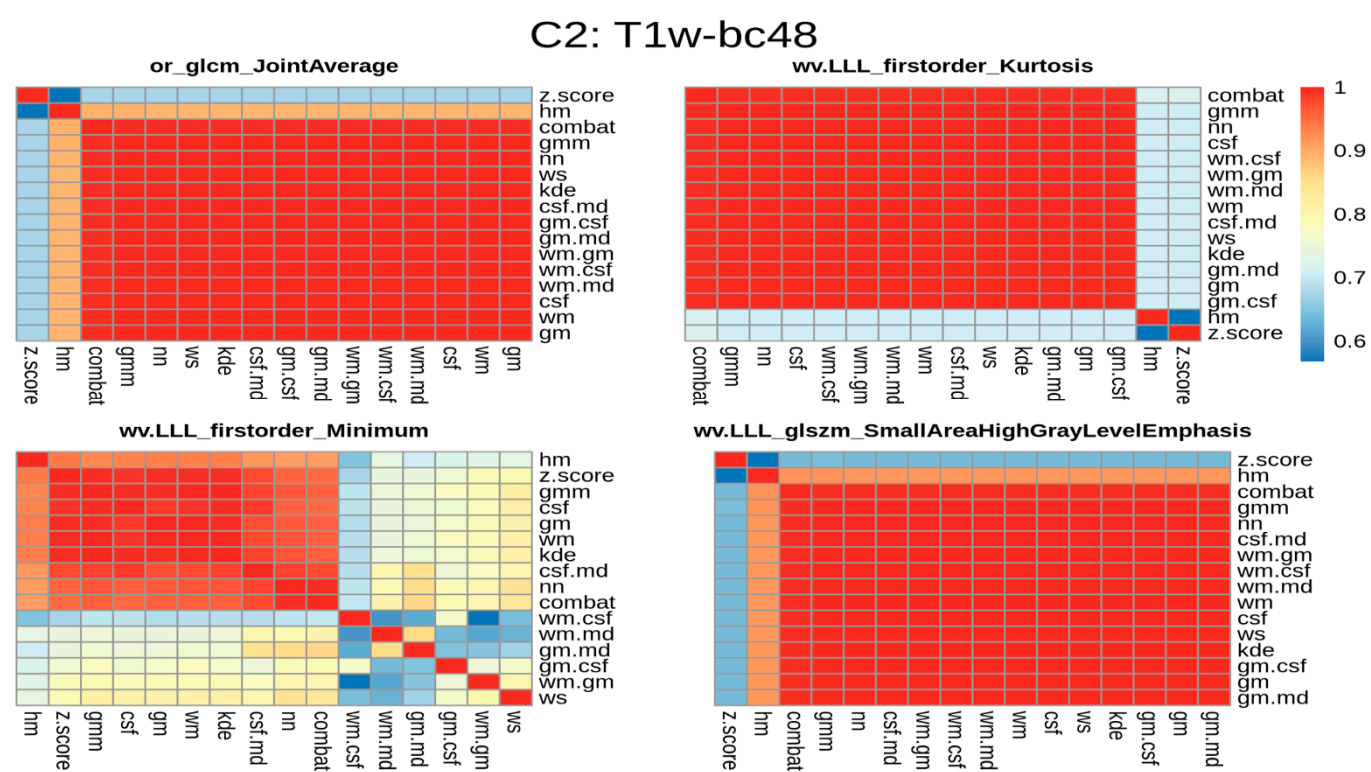

**Supplementary Figure S1-23.** Correlation heatmaps between the 15 different normalization methods considered and the reference non-normalized dataset for T1w significant features in cohort C2 discretized with bin counts of 48.

C2: T1w-bc64

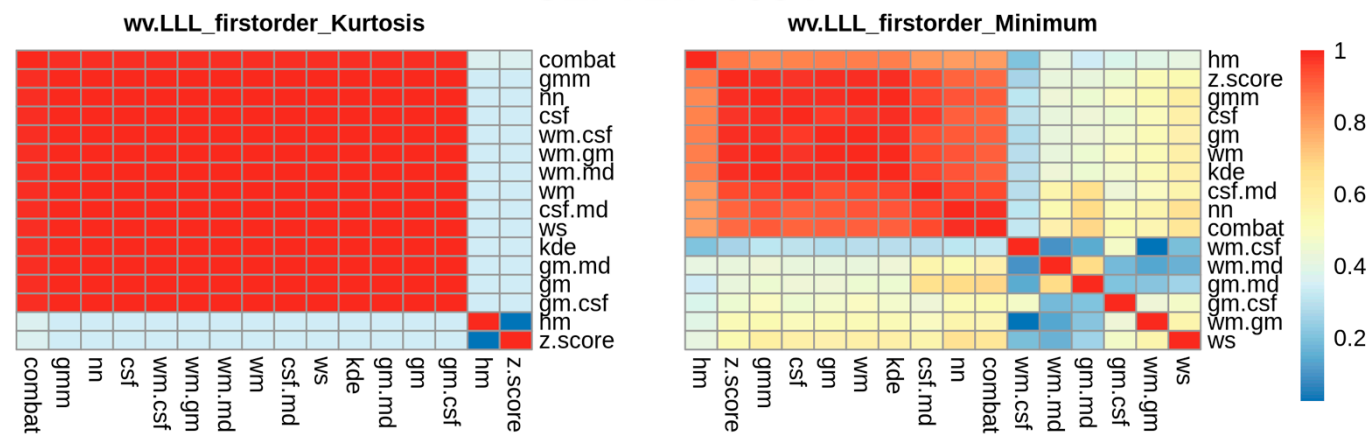

**Supplementary Figure S1-24.** Correlation heatmaps between the 15 different normalization methods considered and the reference non-normalized dataset for T1w significant features in cohort C2 discretized with bin counts of 64.



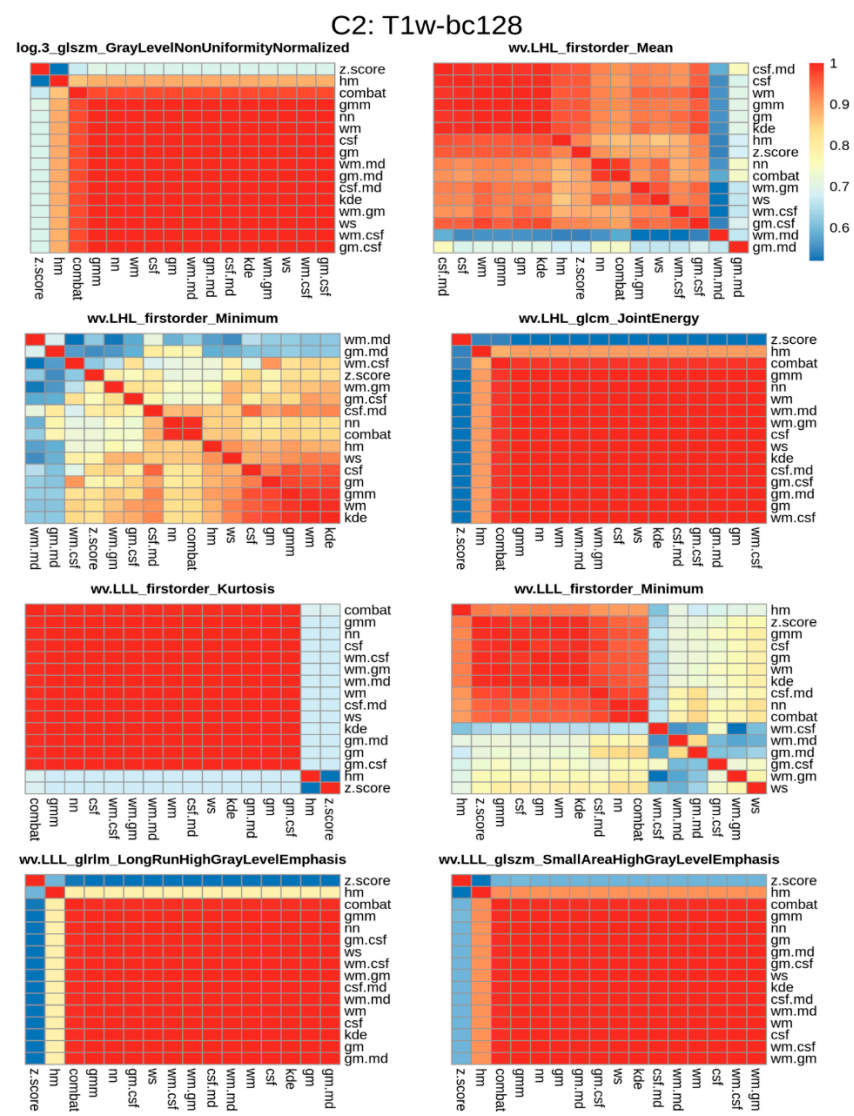

**Supplementary Figure S1-25.** Correlation heatmaps between the 15 different normalization methods considered and the reference non-normalized dataset for T1w significant features in cohort C2 discretized with bin counts of 128.

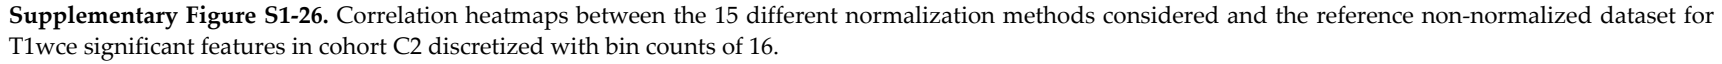

**Supplementary Figure S1-26.** Correlation heatmaps between the 15 different normalization methods considered and the reference non-normalized dataset for T1wce significant features in cohort C2 discretized with bin counts of 16.

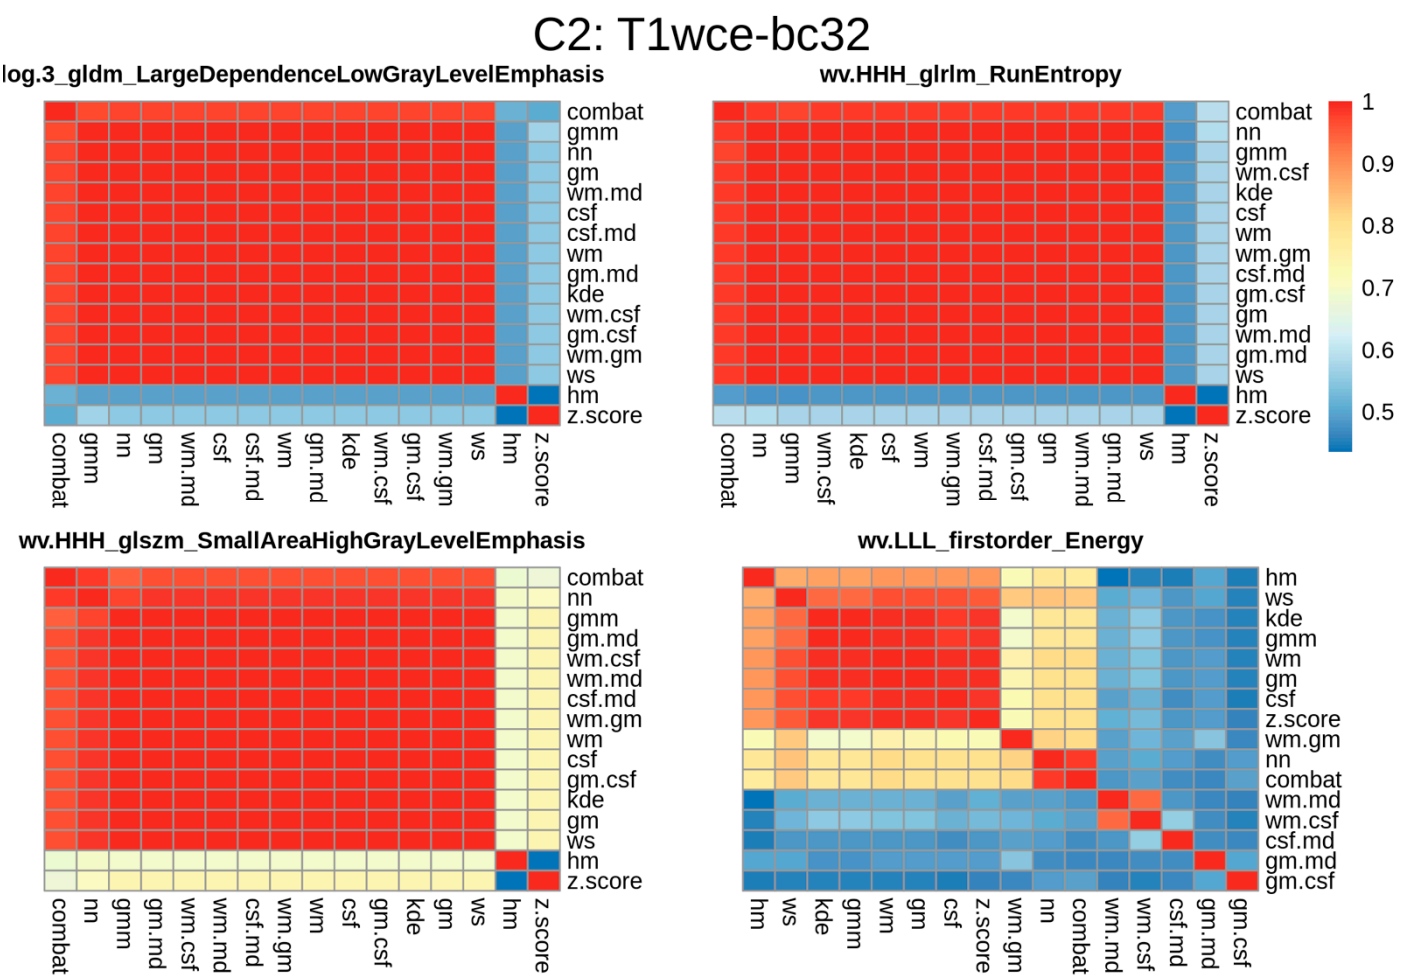

**Supplementary Figure S1-27.** Correlation heatmaps between the 15 different normalization methods considered and the reference non-normalized dataset for T1wce significant features in cohort C2 discretized with bin counts of 32.

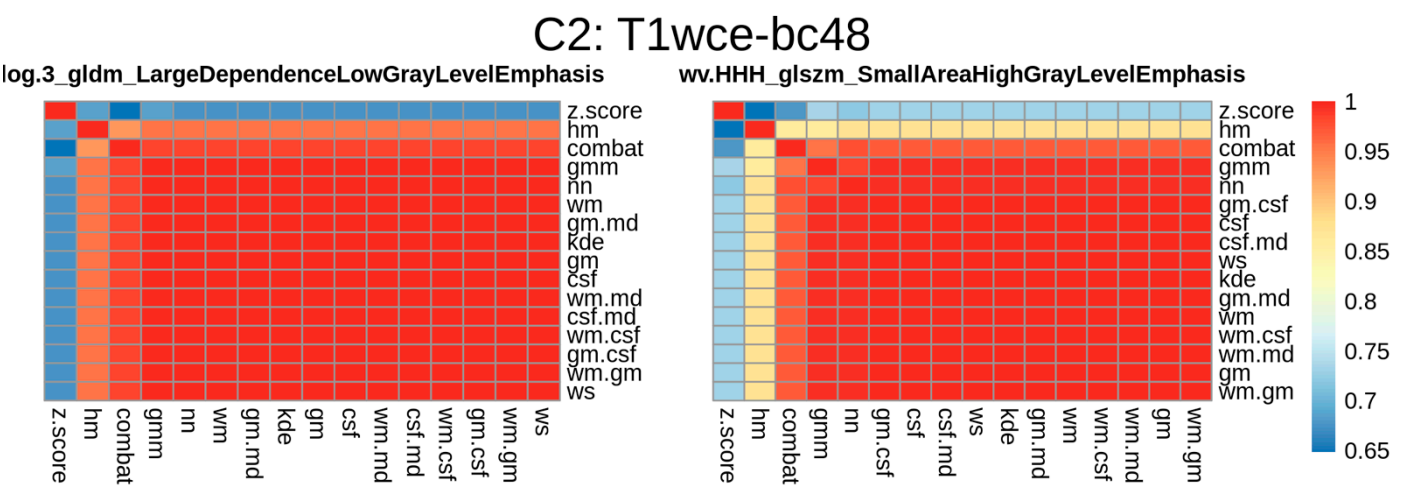

**Supplementary Figure S1-28.** Correlation heatmaps between the 15 different normalization methods considered and the reference non-normalized dataset for T1wce significant features in cohort C2 discretized with bin counts of 48.

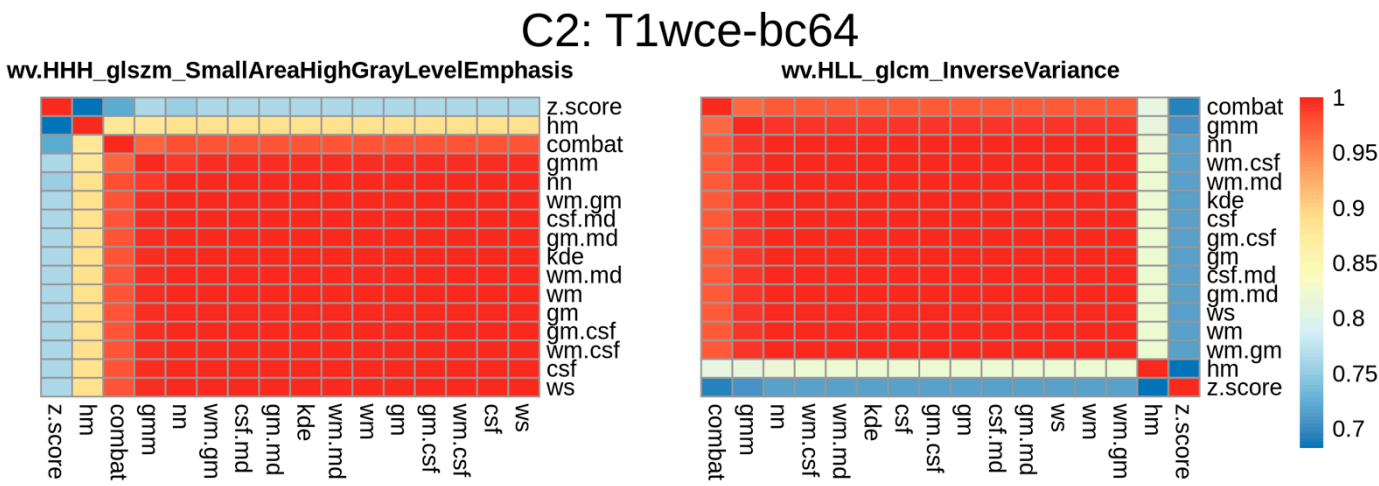

**Supplementary Figure S1-29.** Correlation heatmaps between the 15 different normalization methods considered and the reference non-normalized dataset for T1wce significant features in cohort C2 discretized with bin counts of 64.

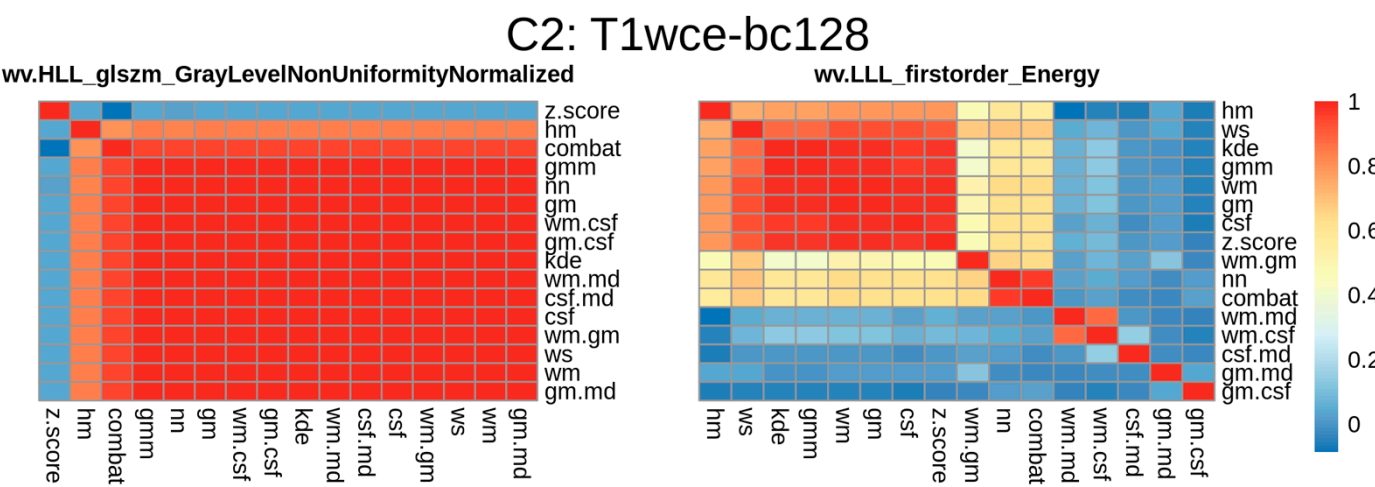

**Supplementary Figure S1-30.** Correlation heatmaps between the 15 different normalization methods considered and the reference non-normalized dataset for T1wce significant features in cohort C2 discretized with bin counts of 128.

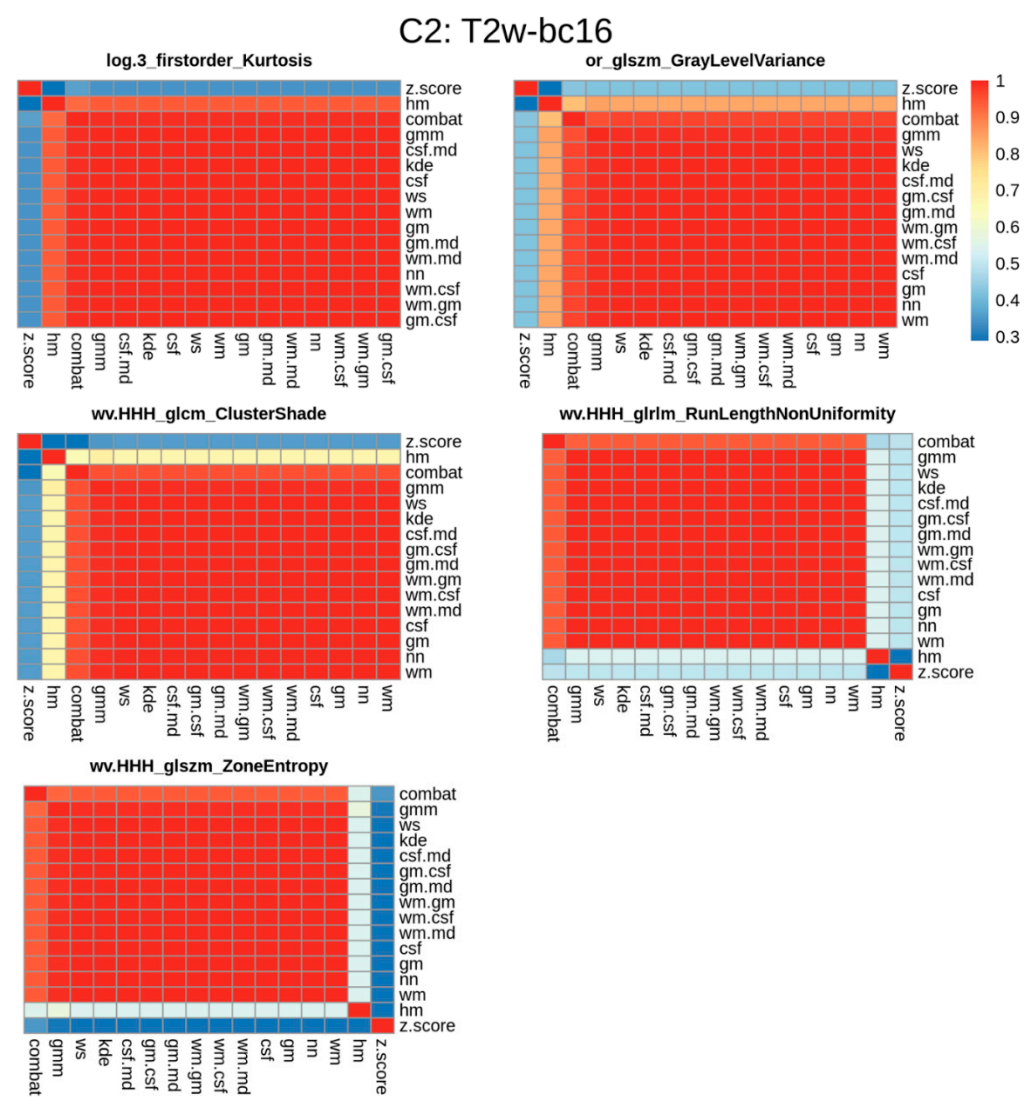

**Supplementary Figure S1-31.** Correlation heatmaps between the 15 different normalization methods considered and the reference non-normalized dataset for T2w significant features in cohort C2 discretized with bin counts of 16.

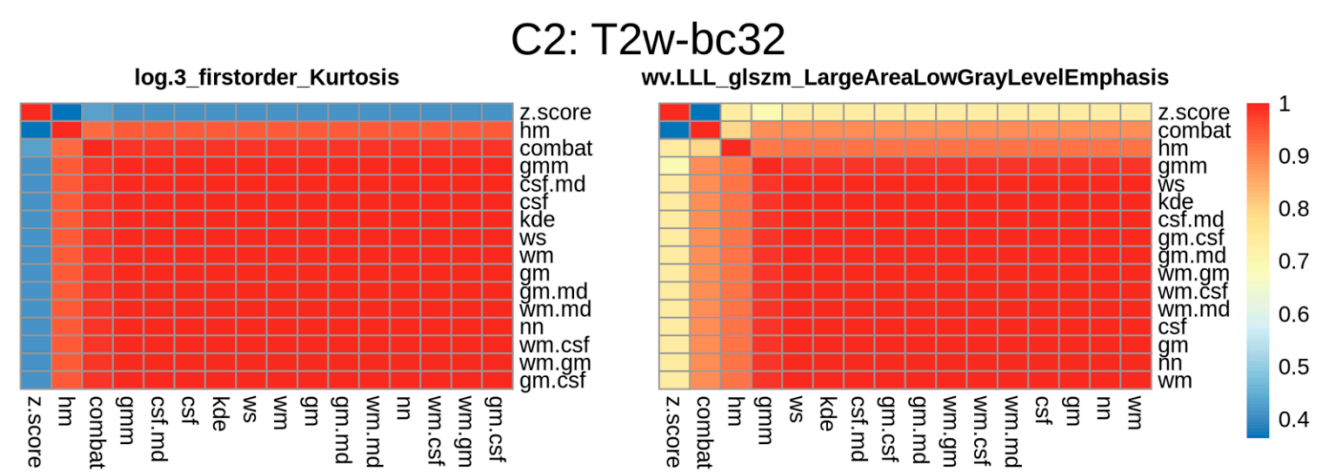

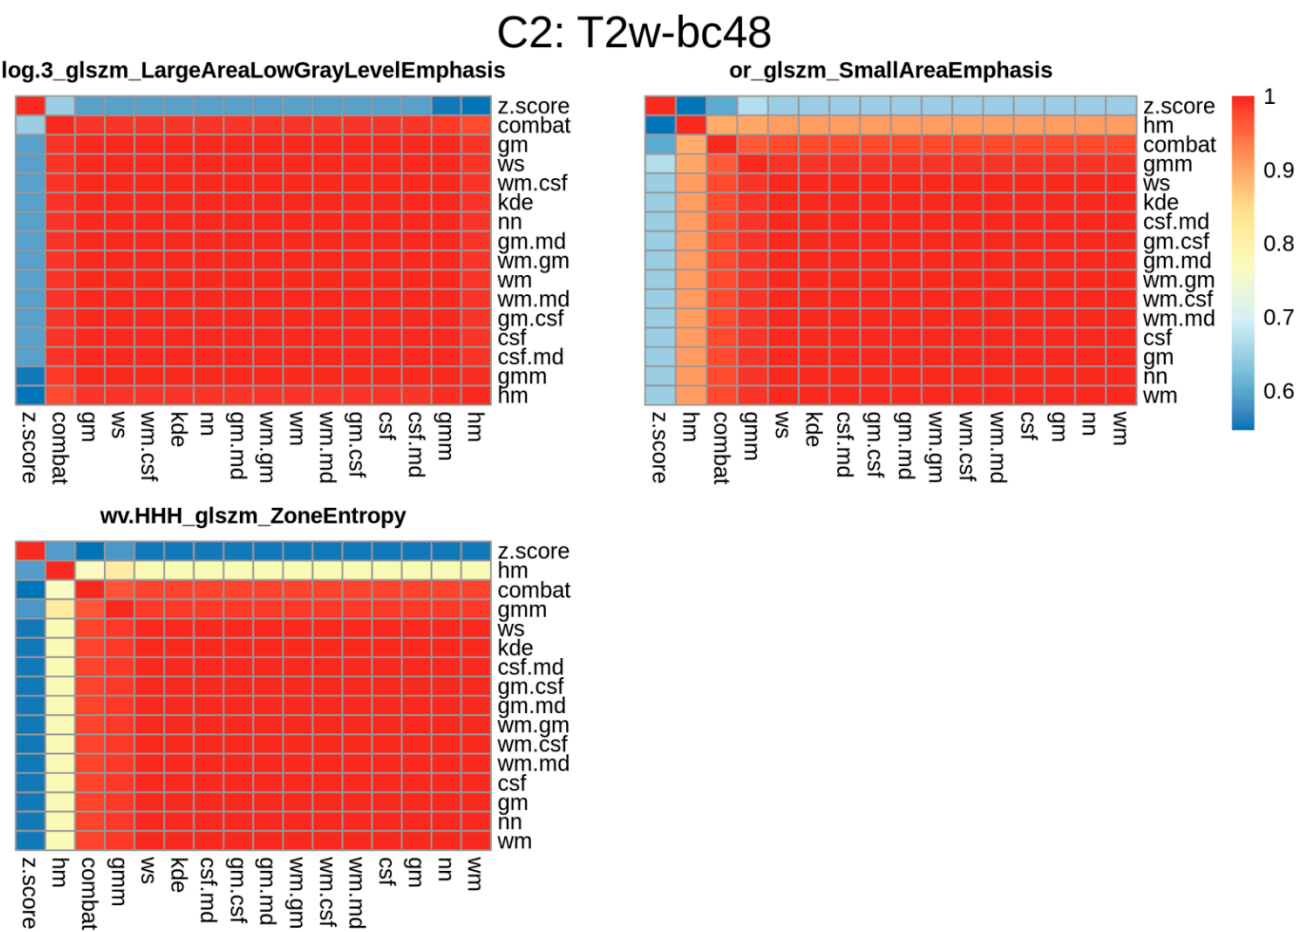

**Supplementary Figure S1-33.** Correlation heatmaps between the 15 different normalization methods considered and the reference non-normalized dataset for T2w significant features in cohort C2 discretized with bin counts of 48.



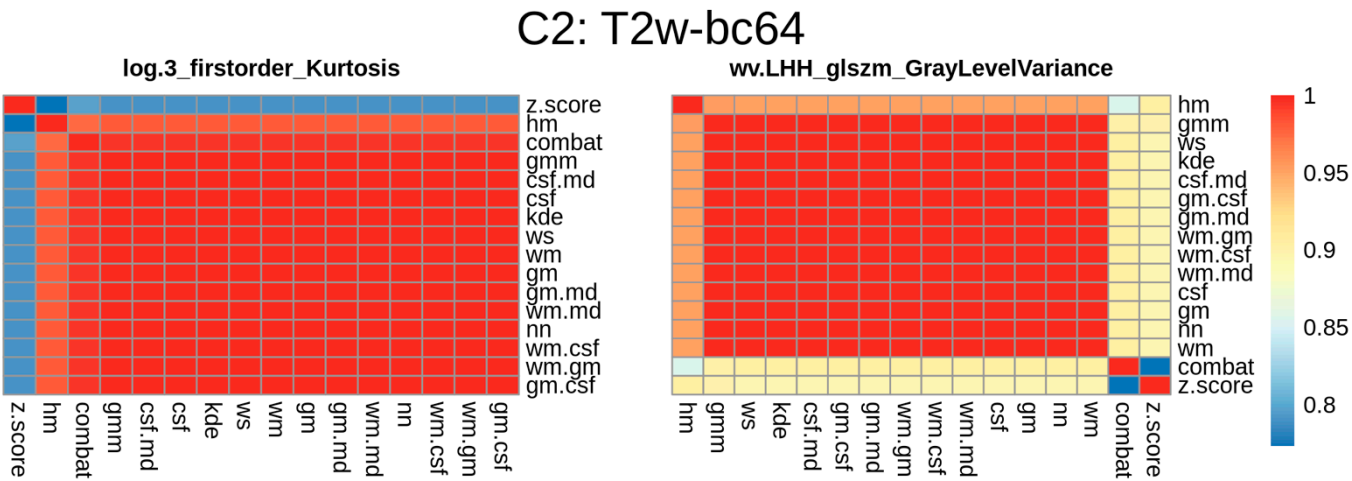

**Supplementary Figure S1-34** Correlation heatmaps between the 15 different normalization methods considered and the reference non-normalized dataset for T2w significant features in cohort C2 discretized with bin counts of 64.

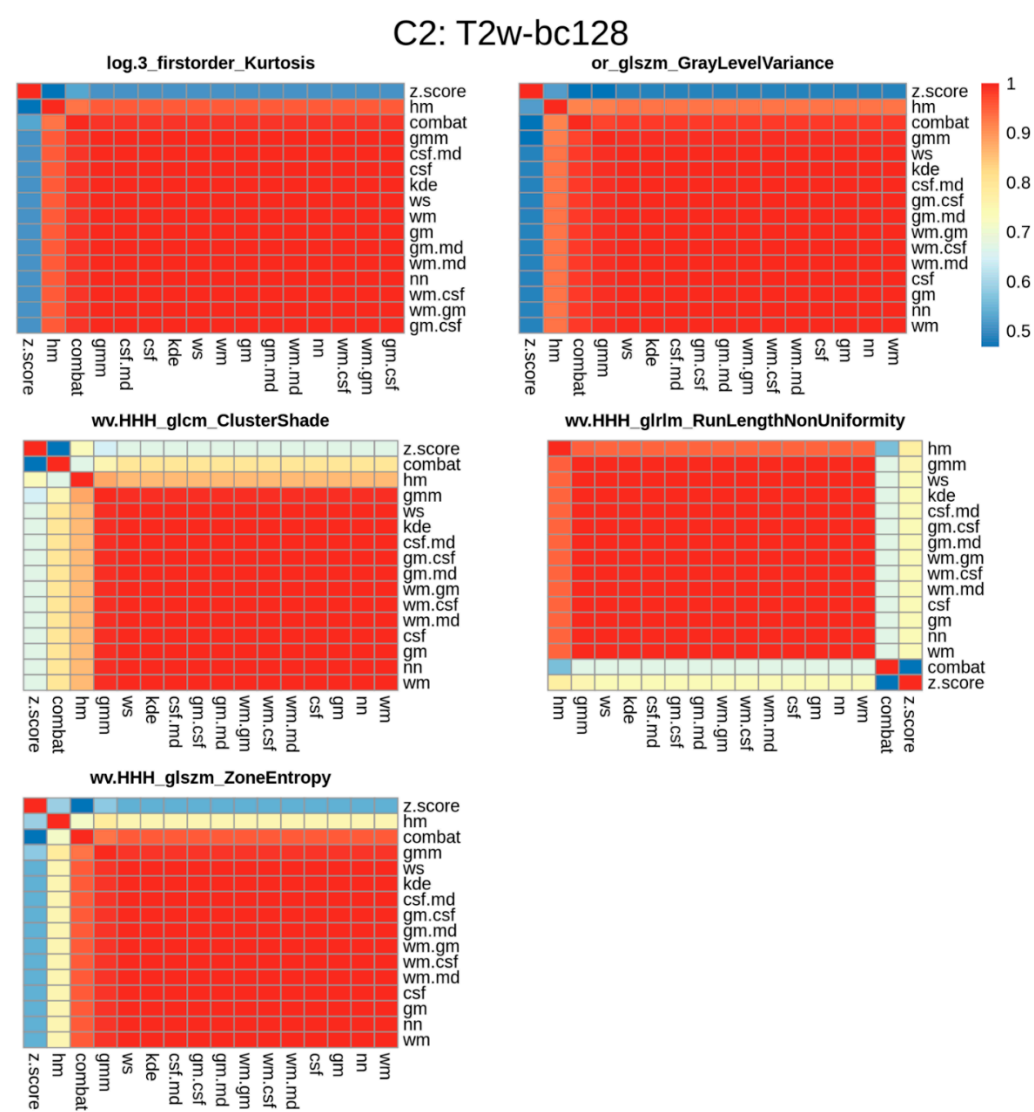

**Supplementary Figure S1-35.** Correlation heatmaps between the 15 different normalization methods considered and the reference non-normalized dataset for T2w significant features in cohort C2 discretized with bin counts of 128.

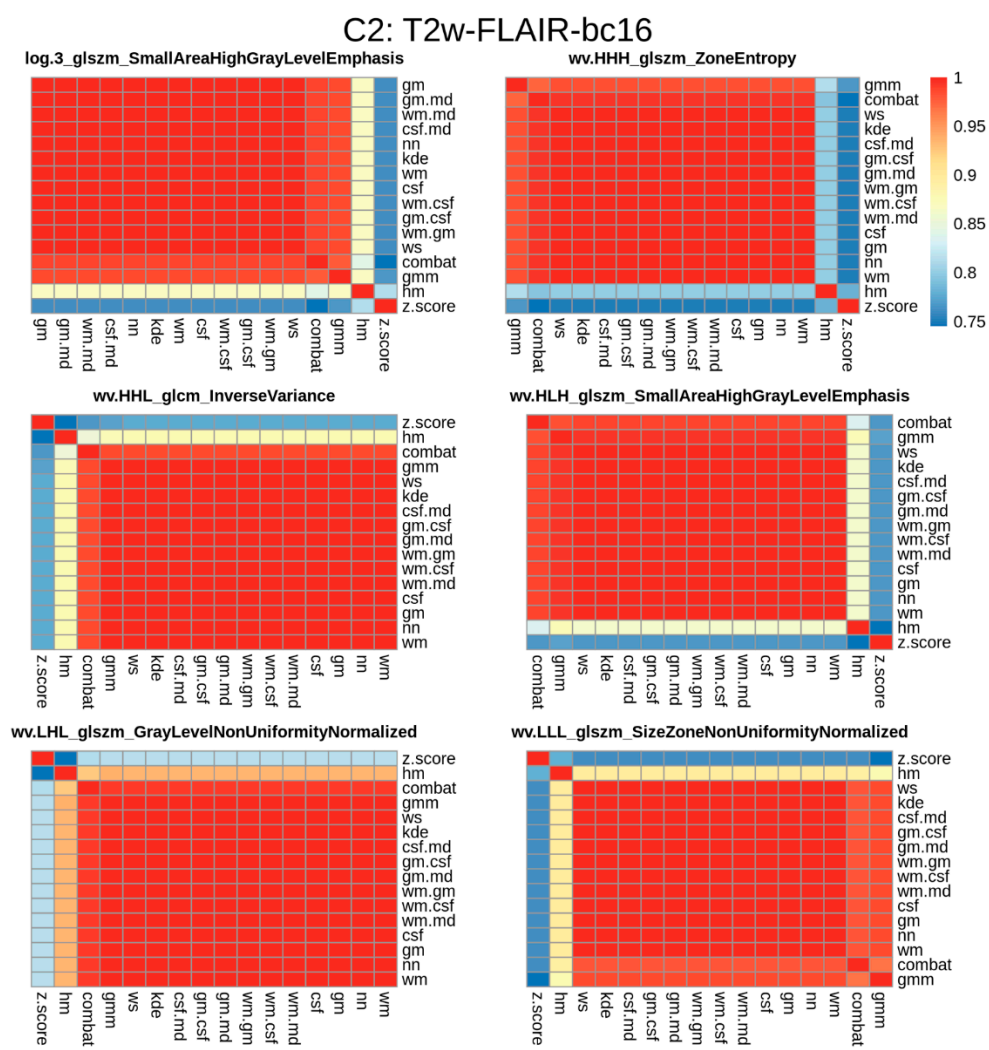

**Supplementary Figure S1-36.** Correlation heatmaps between the 15 different normalization methods considered and the reference non-normalized dataset for T2w-FLAIR significant features in cohort C2 discretized with bin counts of 16.

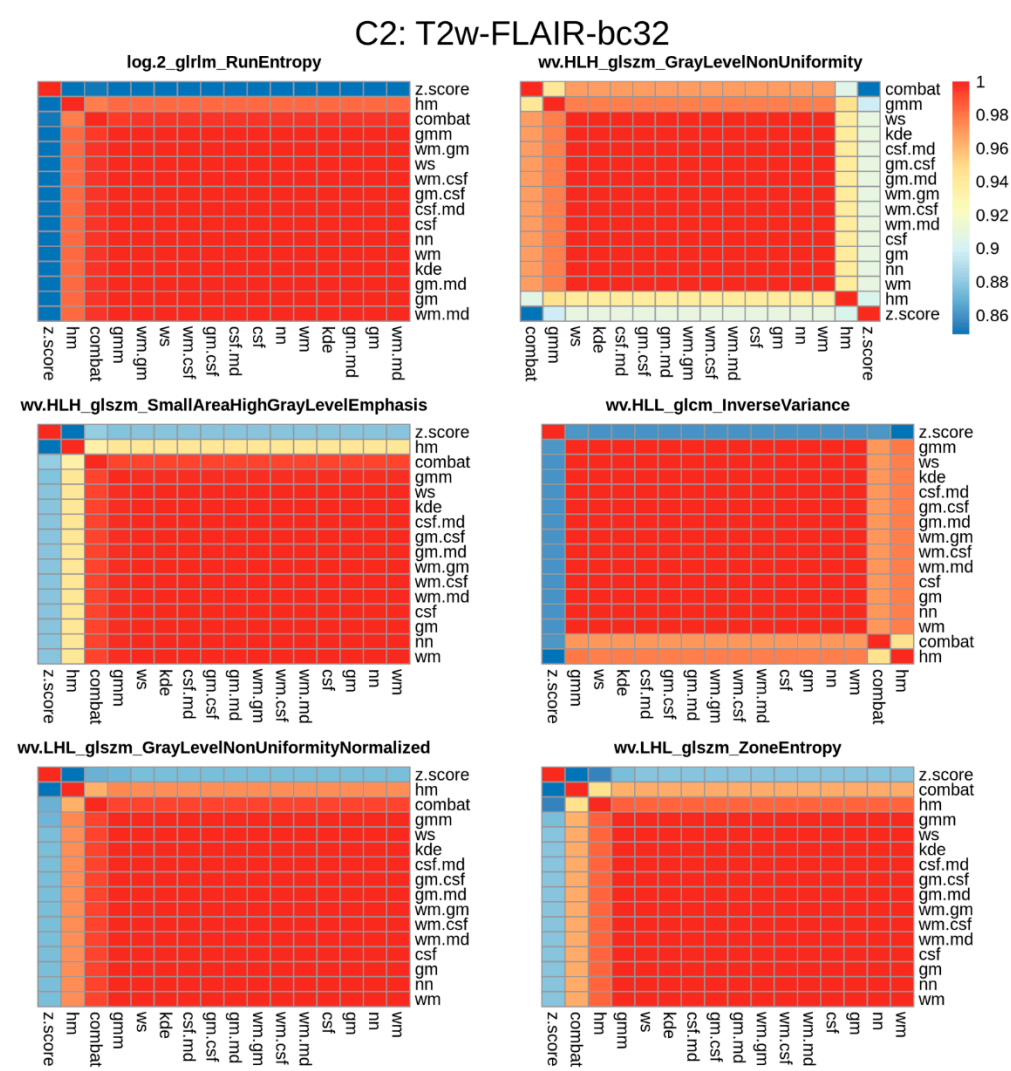

**Supplementary Figure S1-37.** Correlation heatmaps between the 15 different normalization methods considered and the reference non-normalized dataset for T2w-FLAIR significant features in cohort C2 discretized with bin counts of 32.

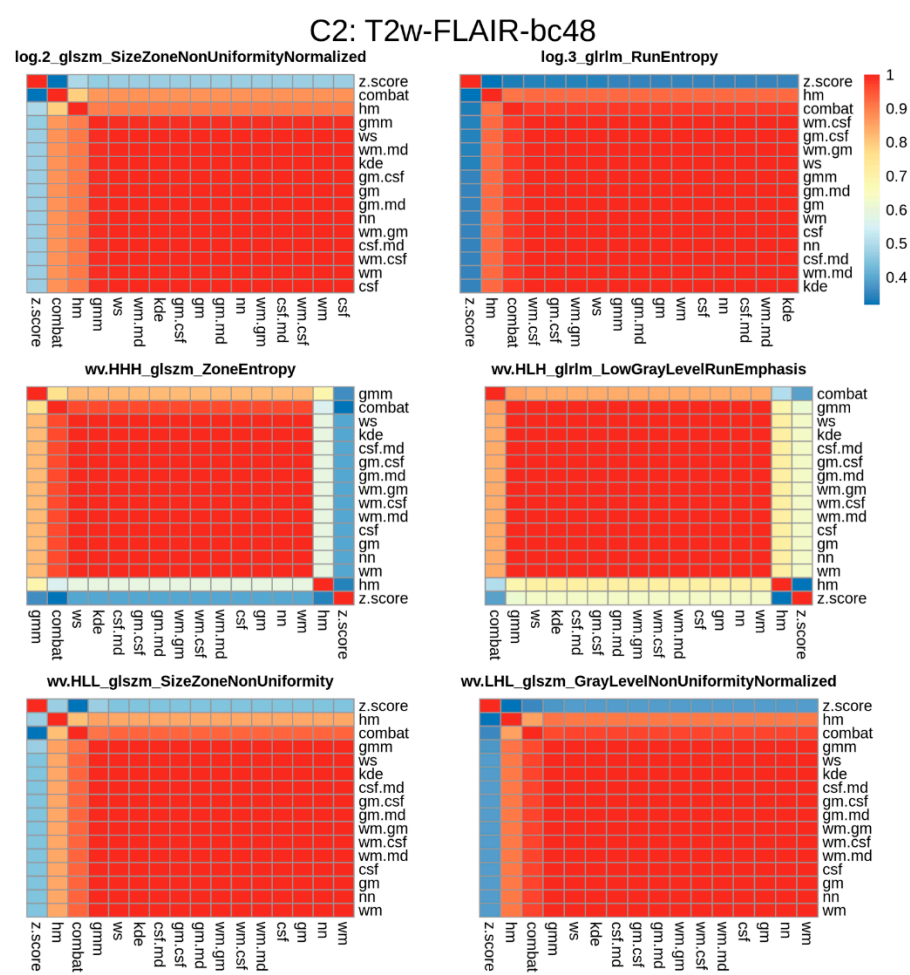

**Supplementary Figure S1-38.** Correlation heatmaps between the 15 different normalization methods considered and the reference non-normalized dataset for T2w-FLAIR significant features in cohort C2 discretized with bin counts of 48.

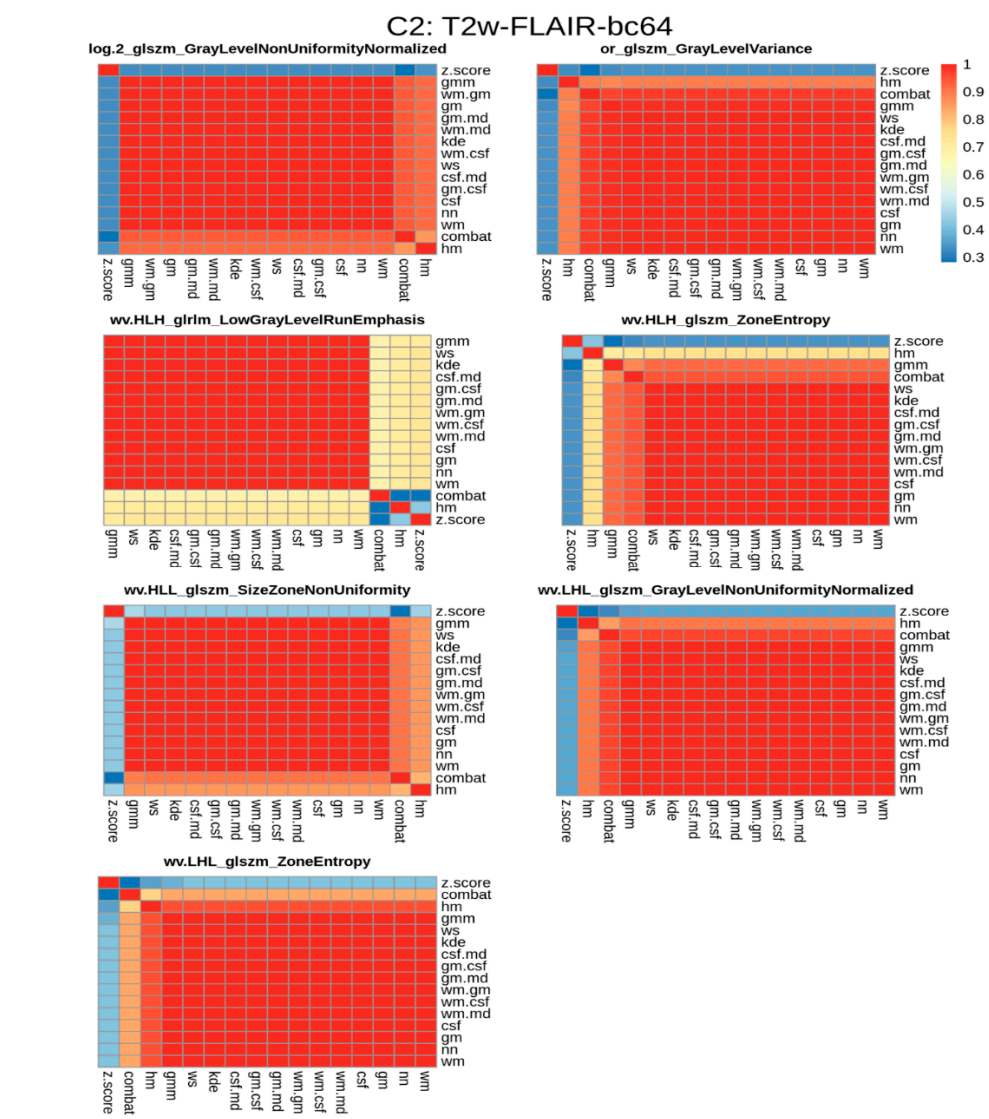

**Supplementary Figure S1-39.** Correlation heatmaps between the 15 different normalization methods considered and the reference non-normalized dataset for T2w-FLAIR significant features in cohort C2 discretized with bin counts of 64.

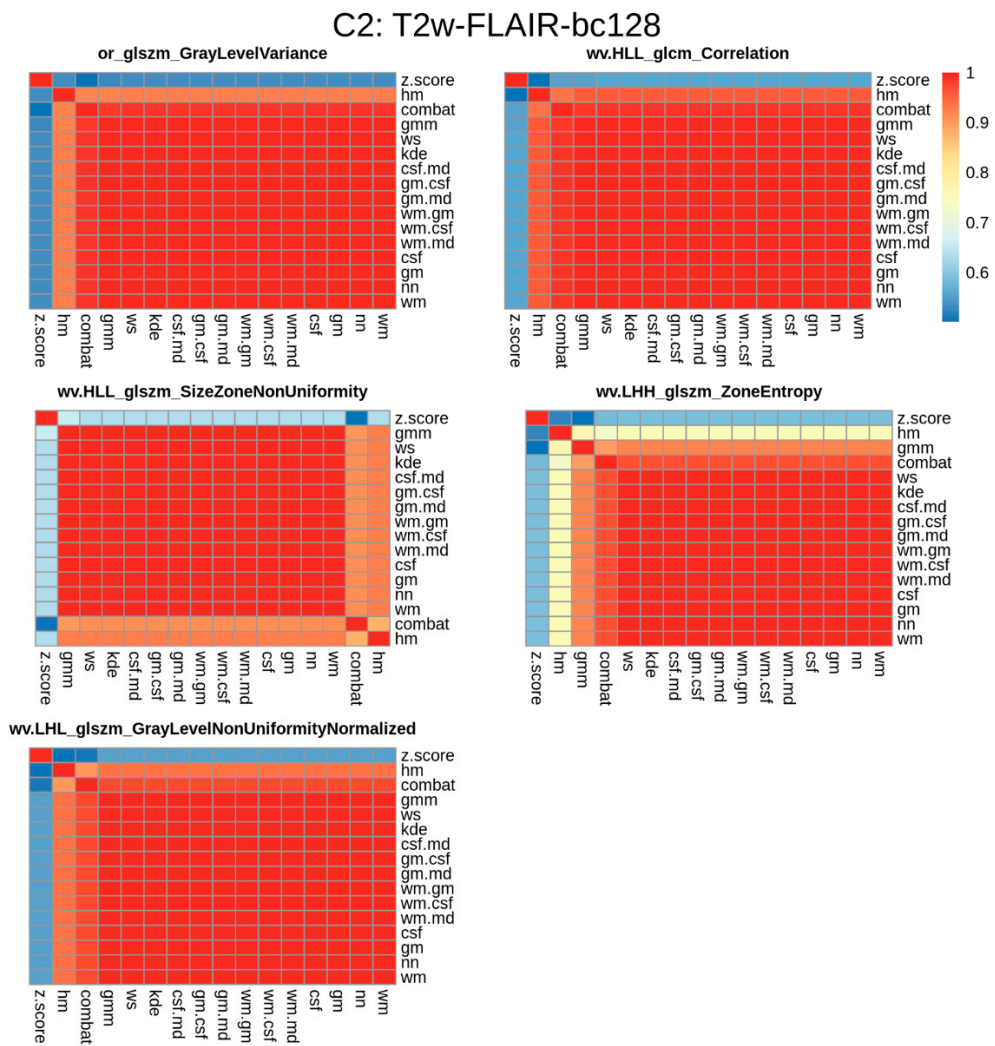

**Supplementary Figure S1-40.** Correlation heatmaps between the 15 different normalization methods considered and the reference non-normalized dataset for T2w-FLAIR significant features in cohort C2 discretized with bin counts of 128.
